# Supplementary material for: Estimating the cost of interventions to improve water, sanitation and hygiene in healthcare facilities across India
Source: PubMed Central journal article supplement — BMJ Glob Health. 2020 Dec 21;5(12):e003045. doi: 10.1136/bmjgh-2020-003045 (PMC7754631; doi:10.1136/bmjgh-2020-003045), 2020-12-21
Supplement: bmjgh-2020-003045supp001.pdf [file bmjgh-2020-003045supp001.pdf]

## **Supplementary Materials for**

### **Estimating the cost of interventions to improve water, sanitation, and hygiene in healthcare facilities across India**

Katie K. Tseng, MPH, Jyoti Joshi, MD, Susmita Shrivastava, Eili Y. Klein, PhD

Correspondence to: [tseng@cddep.org](mailto:tseng@cddep.org)

## Table of Contents

|                                                                                                                                                                                                                                  |           |
|----------------------------------------------------------------------------------------------------------------------------------------------------------------------------------------------------------------------------------|-----------|
| <b>Supplementary Tables.....</b>                                                                                                                                                                                                 | <b>3</b>  |
| <i>Supplementary Table 1. The number of surveyed public and private healthcare facilities with available cost data.....</i>                                                                                                      | <i>3</i>  |
| <i>Supplementary Table 2. Capital and recurrent inputs for estimating the cost of WASH interventions and service units.....</i>                                                                                                  | <i>4</i>  |
| <i>Supplementary Table 3. Healthcare facility characteristics for the Indian public healthcare system.....</i>                                                                                                                   | <i>6</i>  |
| <i>Supplementary Table 4. The proportion of healthcare facilities requiring improvements in WASH.....</i>                                                                                                                        | <i>7</i>  |
| <i>Supplementary Table 5. National costs<sup>a</sup> of implementing WASH interventions in primary health centers in India.....</i>                                                                                              | <i>8</i>  |
| <i>Supplementary Table 6. National costs<sup>a</sup> of implementing WASH interventions in community health centers in India.....</i>                                                                                            | <i>9</i>  |
| <i>Supplementary Table 7. National costs<sup>a</sup> of implementing WASH interventions in district hospitals and medical colleges in India.....</i>                                                                             | <i>10</i> |
| <i>Supplementary Table 8. National costs<sup>a</sup> of implementing WASH interventions across the Indian public healthcare system assuming lower limit estimates of the proportion of HCFs requiring WASH intervention.....</i> | <i>11</i> |
| <i>Supplementary Table 9. National costs<sup>a</sup> of implementing WASH interventions across the Indian public healthcare system assuming upper limit estimates of the proportion of HCFs requiring WASH intervention.....</i> | <i>12</i> |
| <b>References.....</b>                                                                                                                                                                                                           | <b>13</b> |
| <b>Appendix B.....</b>                                                                                                                                                                                                           | <b>14</b> |
| <i>Cost-effectiveness questionnaire for water, sanitation, and hygiene interventions in the Indian public healthcare system.....</i>                                                                                             | <i>14</i> |

## Supplementary Tables

Supplementary Table 1. The number of surveyed public and private healthcare facilities with available cost data

| Intervention                             | All<br>(N = 32) | Public (n = 19) |                |               |               |                      |                     | Private (n = 13) |                      |                     |
|------------------------------------------|-----------------|-----------------|----------------|---------------|---------------|----------------------|---------------------|------------------|----------------------|---------------------|
|                                          |                 | PHC<br>(n = 3)  | CHC<br>(n = 3) | DH<br>(n = 4) | MC<br>(n = 3) | Specialty<br>(n = 3) | Tertiary<br>(n = 3) | MC<br>(n = 2)    | Specialty<br>(n = 6) | Tertiary<br>(n = 5) |
| Water-basic                              | 31              | 3               | 3              | 3             | 3             | 3                    | 3                   | 2                | 6                    | 5                   |
| Water-advanced                           | 25              | 3               | 2              | 2             | 2             | 3                    | 2                   | 2                | 5                    | 4                   |
| Sanitation (toilets)                     | 13              | 1               | 0              | 1             | 0             | 0                    | 3                   | 1                | 3                    | 4                   |
| Hand hygiene (sinks)                     | 29              | 3               | 3              | 4             | 3             | 2                    | 2                   | 2                | 6                    | 4                   |
| Hand hygiene (non-water-based materials) | 30              | 3               | 2              | 4             | 3             | 3                    | 3                   | 2                | 5                    | 5                   |
| Linen reprocessing (on-site)             | 25              | 2               | 3              | 2             | 3             | 3                    | 2                   | 2                | 5                    | 3                   |
| Linen reprocessing (off-site/outsourced) | 16              | 2               | 1              | 3             | 2             | 1                    | 2                   | 0                | 3                    | 2                   |
| Medical device reprocessing              | 31              | 3               | 3              | 4             | 3             | 3                    | 3                   | 1                | 6                    | 5                   |
| Disposable equipment                     | 19              | 2               | 2              | 2             | 3             | 3                    | 1                   | 1                | 3                    | 2                   |
| Surface cleaning                         | 31              | 3               | 3              | 4             | 3             | 3                    | 3                   | 2                | 6                    | 4                   |
| HAIs                                     | 11              | 0               | 0              | 1             | 0             | 0                    | 2                   | 1                | 2                    | 5                   |

Note: CHC = community health center, DH = district hospital, HCF = healthcare facility, MC = medical college, PHC = primary health centers.

† Basic service includes piped potable water, water from a tube well/borehole, or vended water on premise; advanced service includes a water distribution system piped into the facility.

Supplementary Table 2. Capital and recurrent inputs for estimating the cost of WASH interventions and service units

| Intervention unit   | Service unit                                                        | Capital expenditures                                                                                           |                                                      |                                 | Recurrent expenditures                                                                                                                   |                                                  |
|---------------------|---------------------------------------------------------------------|----------------------------------------------------------------------------------------------------------------|------------------------------------------------------|---------------------------------|------------------------------------------------------------------------------------------------------------------------------------------|--------------------------------------------------|
|                     |                                                                     | Inputs                                                                                                         | Data source <sup>a</sup>                             | Expected life years [Reference] | Inputs                                                                                                                                   | Data source <sup>a</sup>                         |
| Basic water service | Improved water source (tubewell/borehole or piped water) on premise | NA                                                                                                             | NA                                                   | NA                              | Vended water service and delivery fee                                                                                                    | 2018-2019 contract                               |
|                     |                                                                     | Drilling rig, fuel, casing, piping, platform, pump, labor, and single maintenance charge for tubewell/borehole | 1998-2018 expenditure reports (precise year unknown) | 20 [1]                          | Staff salary for maintenance of tubewell/borehole                                                                                        | 2017-2018 expenditure report and stock registers |
|                     |                                                                     | Connection to municipal water system for piped water                                                           | 1998-2018 expenditure reports (precise year unknown) | 40 [1]                          | Municipal or private water service/supply fee for piped water                                                                            | 2017-2018 expenditure report and stock registers |
|                     |                                                                     | Pipes, valves, fixtures, installation, and labor for water treatment system                                    | 1998-2018 expenditure reports (precise year unknown) | 20-50 [2]                       | Water treatment and testing supplies; staff salary for maintenance, quality monitoring, safety, and protection of water treatment system | 2017-2018 expenditure report and stock registers |
|                     |                                                                     | Water storage tank(s) and pump(s)                                                                              | 1998-2018 expenditure reports (precise year unknown) | 20 [3]                          | NA                                                                                                                                       | NA                                               |
|                     |                                                                     | Septic tank and/or soak pits                                                                                   | 1998-2018 expenditure reports (precise year unknown) | 30 [1]                          | Staff salary for maintenance, quality monitoring, safety, and protection of sewage system                                                | 2017-2018 expenditure report and stock registers |
|                     |                                                                     | Connection to municipal sewage system                                                                          | 1998-2018 expenditure reports (precise year unknown) | 40 [1]                          | Sewage disposal fee                                                                                                                      | 2017-2018 expenditure report and stock registers |

|                                                         |                                                     |                                                                           |                                                      |                        |                                                                                                                                  |                                                  |
|---------------------------------------------------------|-----------------------------------------------------|---------------------------------------------------------------------------|------------------------------------------------------|------------------------|----------------------------------------------------------------------------------------------------------------------------------|--------------------------------------------------|
| Advanced water service                                  | Water distribution system (piped into the facility) | Pipes, valves, fixtures, installation, and labor                          | 1998-2018 expenditure reports (precise year unknown) | 50 [4]                 | Staff salary for maintenance                                                                                                     | 2017-2018 expenditure report and stock registers |
| Basic sanitation service                                | Flush toilet                                        | Flush toilet, installation, plumbing connection, and labor                | 1998-2018 expenditure reports (precise year unknown) | 20 [5]                 | Staff salary for toilet maintenance/repairs and sewage line maintenance                                                          | 2017-2018 expenditure report and stock registers |
| Improved access to hand hygiene services                | Handwashing station                                 | Sink, installation, plumbing connection, labor, and 500 mL soap dispenser | 1998-2018 expenditure reports (precise year unknown) | 20 [Author's estimate] | Antiseptic hand-wash solution/soap (bar, liquid or foam), and staff salary for sink maintenance/repairs                          | 2017-2018 expenditure report and stock registers |
| Improved access to linen reprocessing services          | In-house laundry machines                           | Washer, hydro-extractor, tumbler, dryer, installation, and labor          | 1998-2018 expenditure reports (precise year unknown) | 12 [6]                 | Laundry detergent, staff salary for laundry and maintenance, electrical fee                                                      | 2017-2018 expenditure report and stock registers |
| Improved access to medical device reprocessing services | Sterilization equipment                             | Steam autoclave or ethylene oxide (EtO) sterilizer                        | 1998-2018 expenditure reports (precise year unknown) | 10 [7]                 | EtO kit, autoclave kit, high-level disinfectant, and staff salary for reprocessing                                               | 2017-2018 expenditure report and stock registers |
| Improved access to surface cleaning services            | Surface cleaning supplies                           | NA                                                                        | NA                                                   | NA                     | Detergent, low-level disinfectant, and custodial or other designated staff salary for cleaning environmental surfaces and spills | 2017-2018 expenditure report and stock registers |

Note: NA = not applicable, WASH = water, sanitation and hygiene.

<sup>a</sup> To adjust for inflation, recurrent costs incurred in different years were converted to the base year 2018 using India's consumer price index (CPI) obtained from the World Bank; capital costs could not be adjusted for inflation as data on the year costs were incurred were not collected.

Supplementary Table 3. Healthcare facility characteristics for the Indian public healthcare system

| Estimated number       | PHC     | CHC        | DH            | MC              |
|------------------------|---------|------------|---------------|-----------------|
| Urban HCFs             | 3,550   | 775        | 1,894         | 206             |
| Rural HCFs             | 22,193  | 4,849      | 0             | 29              |
| Outpatient departments | 1       | 2          | 4             | 12              |
| Licensed beds          | 5 (4-6) | 30 (21-39) | 300 (100-500) | 800 (150-4,700) |
| Toilets                | 6       | 13         | 45            | 124             |
| Handwashing stations   | 4       | 13         | 46            | 175             |

Note: CHC = community health center, DH = district hospital, HCF = healthcare facility, MC = medical college, PHC = primary health centers.

Supplementary Table 4. The proportion of healthcare facilities requiring improvements in WASH

|                                       | Urban cost (95% CI) |                  |                  |                  | Rural cost (95% CI) |                  |                  |                  |
|---------------------------------------|---------------------|------------------|------------------|------------------|---------------------|------------------|------------------|------------------|
|                                       | PHC                 | CHC              | DH               | MC               | PHC                 | CHC              | DH               | MC               |
| Water-basic                           | 0.31 (0.11-0.49)    | 0.29 (0.09-0.48) | 0.09 (0.02-0.29) | 0.09 (0.02-0.29) | 0.48 (0.31-0.65)    | 0.37 (0.20-0.54) | 0.30 (0.13-0.47) | 0.30 (0.13-0.47) |
| Water-advanced                        | 0.52 (0.36-0.66)    | 0.79 (0.52-0.92) | 0.19 (0.08-0.31) | 0.19 (0.08-0.31) | 0.95 (0.87-0.98)    | 0.64 (0.35-0.85) | 0.43 (0.27-0.61) | 0.43 (0.27-0.61) |
| Sanitation<br>(unimproved to basic)   | 0.26 (0.17-0.33)    | 0.23 (0.15-0.29) | 0.20 (0.13-0.25) | 0.20 (0.13-0.25) | 0.30 (0.22-0.41)    | 0.27 (0.20-0.37) | 0.26 (0.17-0.33) | 0.26 (0.17-0.33) |
| Sanitation (limited to<br>basic)      | 0.53 (0.43-0.63)    | 0.47 (0.32-0.63) | 0.37 (0.17-0.57) | 0.37 (0.17-0.57) | 0.49 (0.40-0.58)    | 0.46 (0.30-0.62) | 0.39 (0.19-0.59) | 0.39 (0.19-0.59) |
| Hand hygiene<br>(unimproved to basic) | 0.21 (0.10-0.37)    | 0.15 (0.05-0.28) | 0.10 (0.01-0.19) | 0.10 (0.01-0.19) | 0.31 (0.21-0.56)    | 0.26 (0.16-0.51) | 0.19 (0.09-0.44) | 0.19 (0.09-0.44) |
| Hand hygiene (limited<br>to basic)    | 0.22 (0.10-0.42)    | 0.26 (0.13-0.46) | 0.30 (0.16-0.51) | 0.30 (0.16-0.51) | 0.25 (0.19-0.35)    | 0.25 (0.19-0.35) | 0.25 (0.19-0.35) | 0.25 (0.19-0.35) |
| Linen reprocessing                    | 0.28 (0.13-0.53)    | 0.25 (0.10-0.50) | 0.23 (0.08-0.50) | 0.23 (0.08-0.50) | 0.33 (0.18-0.58)    | 0.29 (0.14-0.54) | 0.25 (0.10-0.50) | 0.25 (0.10-0.50) |
| Medical device<br>reprocessing        | 0.60 (0.39-0.78)    | 0.40 (0.22-0.61) | 0.08 (0.01-0.33) | 0.08 (0.01-0.33) | 0.71 (0.45-0.88)    | 0.50 (0.27-0.73) | 0.35 (0.18-0.57) | 0.35 (0.18-0.57) |
| Surface cleaning                      | 0.79 (0.63-0.91)    | 0.73 (0.56-0.86) | 0.65 (0.52-0.80) | 0.65 (0.52-0.80) | 0.78 (0.45-0.94)    | 0.67 (0.35-0.88) | 0.65 (0.45-0.85) | 0.65 (0.45-0.85) |

Note: CHC = community health center, DH = district hospital, PHCs = primary health centers, MC = medical colleges, WASH = water, sanitation and hygiene.

Supplementary Table 5. National costs<sup>a</sup> of implementing WASH interventions in primary health centers in India

| Intervention                | Urban cost (95% CI)        |                            | Rural cost (95% CI)           |                               | Total cost (95% CI)           |                               |
|-----------------------------|----------------------------|----------------------------|-------------------------------|-------------------------------|-------------------------------|-------------------------------|
|                             | Million INR                | Million USD                | Million INR                   | Million USD                   | Million INR                   | Million USD                   |
| Water-basic                 | 572 (277-866)              | 8.36 (4.05-12.66)          | 5,532 (2,683-8,381)           | 80.89 (39.23-122.55)          | 6,104 (2,960-9,247)           | 89.25 (43.28-135.21)          |
| Water-advanced              | 401 (329-472)              | 5.86 (4.82-6.91)           | 4,580 (3,763-5,396)           | 66.96 (55.02-78.90)           | 4,980 (4,093-5,868)           | 72.83 (59.84-85.81)           |
| Sanitation                  | 666 (544-788)              | 9.74 (7.96-11.52)          | 2,458 (1,063-3,853)           | 35.95 (15.55-56.35)           | 3,125 (1,608-4,641)           | 45.69 (23.51-67.87)           |
| Hand hygiene                | 155 (135-174)              | 2.26 (1.98-2.54)           | 1,371 (970-1,773)             | 20.05 (14.18-25.92)           | 1,526 (1,105-1,947)           | 22.31 (16.16-28.46)           |
| Linen reprocessing          | 446 (222-669)              | 6.52 (3.24-9.79)           | 3,283 (1,634-4,933)           | 48.01 (23.89-72.13)           | 3,729 (1,855-5,602)           | 54.52 (27.13-81.92)           |
| Medical device reprocessing | 252 (87-416)               | 3.68 (1.28-6.09)           | 1,863 (646-3,081)             | 27.24 (9.44-45.05)            | 2,115 (733-3,497)             | 30.93 (10.72-51.14)           |
| Surface cleaning            | 195 (29-362)               | 2.86 (0.42-5.30)           | 1,207 (177-2,236)             | 17.64 (2.59-32.70)            | 1,402 (206-2,598)             | 20.50 (3.01-37.99)            |
| <b>Total</b>                | <b>2,686 (1,624-3,748)</b> | <b>39.28 (23.75-54.81)</b> | <b>20,294 (10,936-29,653)</b> | <b>296.75 (159.91-433.59)</b> | <b>22,981 (12,560-33,401)</b> | <b>336.03 (183.65-488.40)</b> |

Note: INR = Indian Rupee, USD = United States dollar, WASH = water, sanitation and hygiene.

<sup>a</sup> This includes capital and recurrent costs evaluated over a one-year period.



Supplementary Table 6. National costs<sup>a</sup> of implementing WASH interventions in community health centers in India

| Intervention                | Urban cost (95% CI) |                     | Rural cost (95% CI)  |                       | Total cost (95% CI)  |                       |
|-----------------------------|---------------------|---------------------|----------------------|-----------------------|----------------------|-----------------------|
|                             | Million INR         | Million USD         | Million INR          | Million USD           | Million INR          | Million USD           |
| Water-basic                 | 189 (147-231)       | 2.76 (2.15-3.38)    | 1,508 (1,172-1,845)  | 22.06 (17.14-26.97)   | 1,697 (1,319-2,076)  | 24.82 (19.29-30.35)   |
| Water-advanced              | 187 (132-243)       | 2.74 (1.93-3.55)    | 837 (472-1,201)      | 12.23 (6.91-17.56)    | 1,024 (604-1,444)    | 14.97 (8.83-21.11)    |
| Sanitation                  | 290 (237-343)       | 4.24 (3.46-5.02)    | 1,106 (478-1,733)    | 16.17 (6.99-25.34)    | 1,395 (715-2,076)    | 20.40 (10.46-30.35)   |
| Hand hygiene                | 99 (87-112)         | 1.45 (1.27-1.63)    | 883 (625-1,142)      | 12.92 (9.13-16.70)    | 983 (712-1,254)      | 14.37 (10.41-18.33)   |
| Linen reprocessing          | 180 (113-248)       | 2.64 (1.65-3.63)    | 1,310 (817-1,802)    | 19.15 (11.95-26.35)   | 1,490 (930-2,050)    | 21.79 (13.59-29.98)   |
| Medical device reprocessing | 121 (58-183)        | 1.76 (0.85-2.68)    | 943 (455-1,432)      | 13.80 (6.65-20.94)    | 1,064 (513-1,615)    | 15.56 (7.50-23.62)    |
| Surface cleaning            | 177 (132-222)       | 2.59 (1.93-3.25)    | 1,018 (758-1,277)    | 14.88 (11.08-18.68)   | 1,195 (890-1,500)    | 17.47 (13.01-21.93)   |
| <b>Total</b>                | 1,244 (905-1,582)   | 18.19 (13.24-23.14) | 7,605 (4,777-10,432) | 111.20 (69.85-152.54) | 8,849 (5,683-12,015) | 129.39 (83.09-175.68) |

Note: INR = Indian Rupee, USD = United States dollar, WASH = water, sanitation and hygiene.

<sup>a</sup> This includes capital and recurrent costs evaluated over a one-year period.

Supplementary Table 7. National costs<sup>a</sup> of implementing WASH interventions in district hospitals and medical colleges in India

| Intervention                | Urban cost (95% CI)          |                               | Rural cost (95% CI)  |                         | Total cost (95% CI)          |                               |
|-----------------------------|------------------------------|-------------------------------|----------------------|-------------------------|------------------------------|-------------------------------|
|                             | Million INR                  | Million USD                   | Million INR          | Million USD             | Million INR                  | Million USD                   |
| Water-basic                 | 1,150 (899-1,401)            | 16.82 (13.15-20.48)           | 93 (83-102)          | 1.35 (1.21-1.50)        | 1,243 (982-1,503)            | 18.17 (14.36-21.98)           |
| Water-advanced              | 1,227 (546-1,908)            | 17.94 (7.99-27.89)            | 24 (20-29)           | 0.36 (0.30-0.42)        | 1,251 (566-1,936)            | 18.30 (8.28-28.31)            |
| Sanitation                  | 2,562 (2,093-3,030)          | 37.46 (30.61-44.31)           | 55 (24-87)           | 0.81 (0.35-1.27)        | 2,617 (2,117-3,117)          | 38.27 (30.96-45.58)           |
| Hand hygiene                | 1,004 (879-1,128)            | 14.67 (12.85-16.50)           | 49 (34-63)           | 0.71 (0.50-0.92)        | 1,052 (913-1,191)            | 15.39 (13.35-17.42)           |
| Linen reprocessing          | 2,407 (1,585-3,228)          | 35.19 (23.18-47.20)           | 44 (37-52)           | 0.65 (0.54-0.76)        | 2,451 (1,622-3,280)          | 35.84 (23.72-47.96)           |
| Medical device reprocessing | 586 (304-869)                | 8.57 (4.44-12.70)             | 35 (29-41)           | 0.52 (0.43-0.60)        | 622 (333-910)                | 9.09 (4.87-13.31)             |
| Surface cleaning            | 2,784 (2,217-3,351)          | 40.71 (32.41-49.00)           | 120 (88-152)         | 1.76 (1.28-2.23)        | 2,904 (2,304-3,504)          | 42.46 (33.70-51.23)           |
| <b>Total</b>                | <b>11,719 (8,523-14,915)</b> | <b>171.35 (124.62-218.09)</b> | <b>421 (316-526)</b> | <b>6.15 (4.62-7.69)</b> | <b>12,140 (8,838-15,441)</b> | <b>177.51 (129.24-225.78)</b> |

Note: INR = Indian Rupee, MC = medical college, USD = United States dollar, WASH = water, sanitation and hygiene.

<sup>a</sup> This includes capital and recurrent costs evaluated over a one-year period.

Supplementary Table 8. National costs<sup>a</sup> of implementing WASH interventions across the Indian public healthcare system assuming lower limit estimates of the proportion of HCFs requiring WASH intervention

| Intervention                | Urban cost (95% CI)         |                              | Rural cost (95% CI)           |                               | Total cost (95% CI)           |                               |
|-----------------------------|-----------------------------|------------------------------|-------------------------------|-------------------------------|-------------------------------|-------------------------------|
|                             | Million INR                 | Million USD                  | Million INR                   | Million USD                   | Million INR                   | Million USD                   |
| Water-basic                 | 517 (344-690)               | 7.56 (5.03-10.09)            | 4,416 (2,393-6,439)           | 64.57 (34.99-94.16)           | 4,933 (2,736-7,130)           | 72.13 (40.01-104.25)          |
| Water-advanced              | 917 (545-1,290)             | 13.41 (7.97-18.86)           | 4,667 (3,717-5,616)           | 68.24 (54.35-82.12)           | 5,584 (4,262-6,906)           | 81.65 (62.32-100.99)          |
| Sanitation                  | 2,110 (1,724-2,496)         | 30.86 (25.22-36.50)          | 2,699 (1,168-4,230)           | 39.46 (17.07-61.86)           | 4,809 (2,892-6,727)           | 70.32 (42.29-98.36)           |
| Hand hygiene                | 475 (416-534)               | 6.94 (6.08-7.81)             | 1,577 (1,115-2,039)           | 23.06 (16.31-29.82)           | 2,052 (1,531-2,573)           | 30.01 (22.39-37.62)           |
| Linen reprocessing          | 1,116 (699-1,533)           | 16.32 (10.23-22.41)          | 2,441 (1,300-3,581)           | 35.69 (19.02-52.37)           | 3,557 (2,000-5,114)           | 52.01 (29.24-74.78)           |
| Medical device reprocessing | 303 (127-480)               | 4.44 (1.85-7.02)             | 1,709 (670-2,747)             | 24.98 (9.79-40.17)            | 2,012 (797-3,227)             | 29.42 (11.65-47.19)           |
| Surface cleaning            | 2,519 (1,898-3,140)         | 36.83 (27.75-45.92)          | 1,311 (559-2,063)             | 19.17 (8.17-30.16)            | 3,830 (2,456-5,203)           | 56.00 (35.92-76.08)           |
| <b>Total</b>                | <b>7,958 (5,752-10,164)</b> | <b>116.37 (84.11-148.62)</b> | <b>18,819 (10,922-26,717)</b> | <b>275.18 (159.70-390.66)</b> | <b>26,777 (16,674-36,880)</b> | <b>391.55 (243.82-539.28)</b> |

Note: CI = confidence interval, HCF = healthcare facility, INR = Indian Rupee, USD = United States dollar, WASH = water, sanitation and hygiene.

<sup>a</sup>This includes capital and recurrent costs evaluated over a one-year period.

Supplementary Table 9. National costs<sup>a</sup> of implementing WASH interventions across the Indian public healthcare system assuming upper limit estimates of the proportion of HCFs requiring WASH intervention

| Intervention                | Urban cost (95% CI)    |                        | Rural cost (95% CI)    |                        | Total cost (95% CI)    |                          |
|-----------------------------|------------------------|------------------------|------------------------|------------------------|------------------------|--------------------------|
|                             | Million INR            | Million USD            | Million INR            | Million USD            | Million INR            | Million USD              |
| Water-basic                 | 4,922 (3,578-6,265)    | 71.96 (52.32-91.61)    | 9,838 (5,474-14,202)   | 143.85 (80.04-207.67)  | 14,760 (9,052-20,467)  | 215.82 (132.36-299.27)   |
| Water-advanced              | 2,729 (1,463-3,995)    | 39.90 (21.39-58.41)    | 5,870 (4,538-7,202)    | 85.83 (66.35-105.31)   | 8,599 (6,001-11,197)   | 125.73 (87.74-163.72)    |
| Sanitation                  | 4,759 (3,889-5,629)    | 69.59 (56.86-82.31)    | 3,962 (1,714-6,210)    | 57.93 (25.06-90.81)    | 8,721 (5,603-11,839)   | 127.52 (81.92-173.12)    |
| Hand hygiene                | 2,247 (1,967-2,527)    | 32.86 (28.77-36.95)    | 2,999 (2,121-3,877)    | 43.85 (31.01-56.70)    | 5,246 (4,088-6,404)    | 76.71 (59.78-93.65)      |
| Linen reprocessing          | 6,436 (4,091-8,781)    | 94.11 (59.82-128.40)   | 8,298 (4,467-12,129)   | 121.33 (65.32-177.35)  | 14,734 (8,558-20,910)  | 215.44 (125.14-305.75)   |
| Medical device reprocessing | 2,930 (1,456-4,404)    | 42.84 (21.28-64.40)    | 3,744 (1,512-5,977)    | 54.75 (22.11-87.39)    | 6,674 (2,967-10,381)   | 97.59 (43.39-151.79)     |
| Surface cleaning            | 3,860 (2,917-4,804)    | 56.45 (42.65-70.24)    | 2,948 (1,324-4,572)    | 43.10 (19.36-66.85)    | 6,808 (4,241-9,376)    | 99.55 (62.01-137.09)     |
| <b>Total</b>                | 27,883 (19,360-36,405) | 407.70 (283.09-532.32) | 37,659 (21,149-54,169) | 550.66 (309.25-792.07) | 65,542 (40,510-90,574) | 958.37 (592.34-1,324.39) |

Note: CI = confidence interval, HCF = healthcare facility, INR = Indian Rupee, USD = United States dollar, WASH = water, sanitation and hygiene

<sup>a</sup>This includes capital and recurrent costs evaluated over a one-year period.

## References

- 1 Haller L, Hutton G, Bartram J. Estimating the costs and health benefits of water and sanitation improvements at global level. *J Water Health* 2007;**5**:467–80. doi:10.2166/wh.2007.008
- 2 U.S. Wastewater Treatment Factsheet | Center for Sustainable Systems. <http://css.umich.edu/factsheets/us-wastewater-treatment-factsheet> (accessed 12 Aug 2020).
- 3 Sintex Water Tanks. indiamart.com. <https://www.indiamart.com/proddetail/sintex-water-tanks-1192531888.html> (accessed 31 Aug 2020).
- 4 Baird GM. The Epidemic of Corrosion, Part 1: Examining Pipe Life. *Journal AWWA* 2011;**103**:14–21. doi:10.1002/j.1551-8833.2011.tb11574.x
- 5 Hutton G, Patil S, Kumar A, *et al.* Comparison of the costs and benefits of the Clean India Mission. *World Development* 2020;**134**:105052. doi:10.1016/j.worlddev.2020.105052
- 6 Cooper DR, Skelton ACH, Moynihan MC, *et al.* Component level strategies for exploiting the lifespan of steel in products. *Resources, Conservation and Recycling* 2014;**84**:24–34. doi:10.1016/j.resconrec.2013.11.014
- 7 Basu S, Paul DK, Ganguly S, *et al.* Risk factors for mortality from neonatal tetanus: 7 years experience in North Bengal, India. *Annals of Tropical Paediatrics* 2006;**26**:233–9. doi:10.1179/146532806X120336

## Appendix B

Cost-effectiveness questionnaire for water, sanitation, and hygiene interventions in the Indian public healthcare system.

### Part I. General overview

*The following questions are about the facility's general infrastructure, the population it serves, and the services provided.*

| No.  | Question                                                                                                                                                                                                                                                               | Answer | Remarks/Notes |
|------|------------------------------------------------------------------------------------------------------------------------------------------------------------------------------------------------------------------------------------------------------------------------|--------|---------------|
| G1.1 | What type of facility is this? <ul style="list-style-type: none"> <li>• Sub-center</li> <li>• Primary health center</li> <li>• Community health center</li> <li>• Sub-district or district hospital</li> <li>• Tertiary hospital</li> <li>• Other (specify)</li> </ul> |        |               |
| G1.2 | Is the facility in a rural or urban setting?                                                                                                                                                                                                                           |        |               |
| G1.3 | Is the facility a public or private institution?                                                                                                                                                                                                                       |        |               |
| G2.1 | What population does the facility serve (e.g., pregnant women, newborns, community)?                                                                                                                                                                                   |        |               |
| G2.2 | What is the size of the population, which this facility serves?                                                                                                                                                                                                        |        |               |

| No.  | Question                                                                                                                                                                                                                                                                                                                                                                                                                                                                                                                                                                                                                                                  | Answer                                                            | Remarks/Notes |
|------|-----------------------------------------------------------------------------------------------------------------------------------------------------------------------------------------------------------------------------------------------------------------------------------------------------------------------------------------------------------------------------------------------------------------------------------------------------------------------------------------------------------------------------------------------------------------------------------------------------------------------------------------------------------|-------------------------------------------------------------------|---------------|
| G2.3 | This facility has ___ number of...                                                                                                                                                                                                                                                                                                                                                                                                                                                                                                                                                                                                                        | _____ Beds<br>_____ Doctors<br>_____ Nurses<br>_____ Other: _____ |               |
| G3.1 | Does the facility have multiple departments (e.g., OPD, IPD)?                                                                                                                                                                                                                                                                                                                                                                                                                                                                                                                                                                                             |                                                                   |               |
| G3.2 | Does the facility have an operation theatre?                                                                                                                                                                                                                                                                                                                                                                                                                                                                                                                                                                                                              |                                                                   |               |
| G3.3 | Does the facility have specific facilities for deliveries (e.g., delivery suite, labour/delivery room, neonatal room, etc.)? If so, please describe.                                                                                                                                                                                                                                                                                                                                                                                                                                                                                                      |                                                                   |               |
| G3.4 | Does the facility have specific care units for neonatal care (e.g., NICU, SNCU, nursery)?<br>*NICU = neonatal intensive care unit<br>*SNCU = sick newborn care unit                                                                                                                                                                                                                                                                                                                                                                                                                                                                                       |                                                                   |               |
| G4.1 | The facility offers the following outpatient department services (check all that apply): <ul style="list-style-type: none"> <li><input type="checkbox"/> Maternity               <ul style="list-style-type: none"> <li><input type="checkbox"/> Antenatal</li> <li><input type="checkbox"/> Delivery including high risk pregnancy? Circle: Yes/No</li> <li><input type="checkbox"/> Postnatal</li> </ul> </li> <li><input type="checkbox"/> Neonatal</li> <li><input type="checkbox"/> Nursery</li> <li><input type="checkbox"/> General Medicine</li> <li><input type="checkbox"/> Obstetrics</li> <li><input type="checkbox"/> Gynaecology</li> </ul> |                                                                   |               |

| No.  | Question                                                                                                                                                                                                                                                                                                                                                                                                                                                                                                                                                                                                                                                                | Answer | Remarks/Notes |
|------|-------------------------------------------------------------------------------------------------------------------------------------------------------------------------------------------------------------------------------------------------------------------------------------------------------------------------------------------------------------------------------------------------------------------------------------------------------------------------------------------------------------------------------------------------------------------------------------------------------------------------------------------------------------------------|--------|---------------|
|      | <input type="checkbox"/> Other: _____                                                                                                                                                                                                                                                                                                                                                                                                                                                                                                                                                                                                                                   |        |               |
| G4.2 | <p>The facility has the following inpatient department wards/rooms (check all that apply and provide the number of beds):</p> <input type="checkbox"/> Male medical: ___ beds<br><input type="checkbox"/> Male surgical: ___ beds<br><input type="checkbox"/> Female medical: ___ beds<br><input type="checkbox"/> Female surgical: ___ beds<br><input type="checkbox"/> Maternity ward: ___ beds<br><input type="checkbox"/> Labour room: ___ beds<br><input type="checkbox"/> Neonatal ward: ___ beds<br><input type="checkbox"/> Neonatal intensive care ward: ___ beds<br><input type="checkbox"/> Children ward: ___ beds<br><input type="checkbox"/> Other: _____ |        |               |
| G4.3 | <p>The following procedures are available at the facility (check all that apply):</p> <p><u>OPD/IPD procedures:</u></p> <input type="checkbox"/> Bronchoscopy<br><input type="checkbox"/> Endoscopy<br><input type="checkbox"/> Dressing (small, medium and large)<br><input type="checkbox"/> Injection (intramuscular and intravenous)<br><input type="checkbox"/> Catheterization<br><input type="checkbox"/> Nebulization<br><input type="checkbox"/> Douche<br><input type="checkbox"/> Blood Transfusion<br><input type="checkbox"/> Hydrotherapy <p><u>Pediatric procedures specifically relating to newborn care:</u></p> <input type="checkbox"/> Incubator    |        |               |



| No.  | Question                                                                                                                                                                                                                                                                                                                                                                                                                                                                                                                                                                                                                                                                                                                                                                                                                                                                                                                                                                                                                                                                                                                                                                                                                                                                                                                                                                                     | Answer | Remarks/Notes |
|------|----------------------------------------------------------------------------------------------------------------------------------------------------------------------------------------------------------------------------------------------------------------------------------------------------------------------------------------------------------------------------------------------------------------------------------------------------------------------------------------------------------------------------------------------------------------------------------------------------------------------------------------------------------------------------------------------------------------------------------------------------------------------------------------------------------------------------------------------------------------------------------------------------------------------------------------------------------------------------------------------------------------------------------------------------------------------------------------------------------------------------------------------------------------------------------------------------------------------------------------------------------------------------------------------------------------------------------------------------------------------------------------------|--------|---------------|
|      | <ul style="list-style-type: none"> <li><input type="checkbox"/> Gases (oxygen)</li> <li><input type="checkbox"/> Intubation (endotracheal tube)</li> <li><input type="checkbox"/> Pulse oximeter</li> <li><input type="checkbox"/> Lumbar puncture</li> <li><input type="checkbox"/> Exchange transfusion</li> <li><input type="checkbox"/> Cut down (venous)</li> <li><input type="checkbox"/> Plural/ascites tap</li> <li><input type="checkbox"/> Ventilator</li> <li><input type="checkbox"/> Live biopsy</li> <li><input type="checkbox"/> Neonatal resuscitation</li> <li><input type="checkbox"/> Care of sick new born</li> <li><input type="checkbox"/> Management of complications through SNCU (Sick Newborn Care Unit)</li> </ul> <p><u>Obstetric &amp; Gynecology specialist services:</u></p> <ul style="list-style-type: none"> <li><input type="checkbox"/> Forceps delivery</li> <li><input type="checkbox"/> Craniotomy-dead fetus/hydrocephalus</li> <li><input type="checkbox"/> Caesarean section</li> <li><input type="checkbox"/> Suturing perineal tears</li> <li><input type="checkbox"/> Caesarian hysterectomy</li> <li><input type="checkbox"/> Ectopic pregnancy ruptured &amp; unruptured</li> <li><input type="checkbox"/> Retained placenta</li> <li><input type="checkbox"/> Suturing cervical tear</li> <li><input type="checkbox"/> Colposcopy</li> </ul> |        |               |
| G4.4 | <p>If a labor ward, neonatal or special newborn care unit exists, which of the following equipment is present in the facility?</p> <ul style="list-style-type: none"> <li><input type="checkbox"/> Baby incubators</li> <li><input type="checkbox"/> Neonatal resuscitation kit</li> </ul>                                                                                                                                                                                                                                                                                                                                                                                                                                                                                                                                                                                                                                                                                                                                                                                                                                                                                                                                                                                                                                                                                                   |        |               |

| No. | Question                                                                                                                                                                                                                                                                                                                                                                                                                                                                                                                                                                                                                                                                                                                                                                                                                            | Answer | Remarks/Notes |
|-----|-------------------------------------------------------------------------------------------------------------------------------------------------------------------------------------------------------------------------------------------------------------------------------------------------------------------------------------------------------------------------------------------------------------------------------------------------------------------------------------------------------------------------------------------------------------------------------------------------------------------------------------------------------------------------------------------------------------------------------------------------------------------------------------------------------------------------------------|--------|---------------|
|     | <ul style="list-style-type: none"><li><input type="checkbox"/> Neonatal laryngoscope</li><li><input type="checkbox"/> Newborn care equipment</li><li><input type="checkbox"/> Delivery kit</li><li><input type="checkbox"/> Episiotomy kit</li><li><input type="checkbox"/> Forceps delivery kit</li><li><input type="checkbox"/> Nebulizer baby</li><li><input type="checkbox"/> CPAP machine</li><li><input type="checkbox"/> Weighting machine infant</li><li><input type="checkbox"/> BP apparatus &amp; stethoscope</li><li><input type="checkbox"/> Infusion pump or syring pump</li><li><input type="checkbox"/> Suction machine</li><li><input type="checkbox"/> Digital thermometer</li><li><input type="checkbox"/> Other: _____</li></ul> <p data-bbox="363 846 825 878">&gt;&gt; Proceed to "Part II. Water Source"</p> |        |               |

## Part II. Water source

The purpose of the following questions is to determine the main source of water for the healthcare facility, the cost of water provision and infrastructure, and the quality and availability of water.

| No. | Question                                                                                                                                                                                                                                                                                                                                                                                                                                                                                                                                                                                                                                                                                                                                                                                                                                                                                                                                                                                                                                                                                                                                                                                                                                                                                                 | Remarks/Notes |
|-----|----------------------------------------------------------------------------------------------------------------------------------------------------------------------------------------------------------------------------------------------------------------------------------------------------------------------------------------------------------------------------------------------------------------------------------------------------------------------------------------------------------------------------------------------------------------------------------------------------------------------------------------------------------------------------------------------------------------------------------------------------------------------------------------------------------------------------------------------------------------------------------------------------------------------------------------------------------------------------------------------------------------------------------------------------------------------------------------------------------------------------------------------------------------------------------------------------------------------------------------------------------------------------------------------------------|---------------|
| W1  | <p>What is the primary source of water for the facility?</p> <p>Please circle one of the following:</p> <p style="padding-left: 40px;">Piped water into facility<sup>a</sup> &gt;&gt; <i>Go to W2.1</i></p> <p style="padding-left: 40px;">Piped water to plot/yard<sup>b</sup> &gt;&gt; <i>Go to W2.1</i></p> <p style="padding-left: 40px;">Tubewell or borehole<sup>d</sup> &gt;&gt; <i>Go to W3.1</i></p> <p style="padding-left: 40px;">Cart with small tank/drum<sup>e</sup> &gt;&gt; <i>Go to W4.1</i></p> <p style="padding-left: 40px;">Tanker-truck<sup>f</sup> &gt;&gt; <i>Go to W4.1</i></p> <p style="padding-left: 40px;">Dug well &gt;&gt; <i>Go to W5.1</i></p> <p style="padding-left: 40px;">Public tap or standpipe<sup>c</sup> &gt;&gt; <i>Go to W6.1</i></p> <p style="padding-left: 40px;">Other: _____ &gt;&gt; <i>Go to W6.1</i></p> <p><u>Definitions:</u></p> <p><sup>a</sup> <b>Piped water into facility:</b> a water service pipe connected with in-facility plumbing to one or more taps</p> <p><sup>b</sup> <b>Piped water to yard/plot:</b> a piped water connection to a tap placed in the yard or plot outside the facility</p> <p><sup>c</sup> <b>Public tap or standpipe:</b> a public water point from which people can collect water (e.g., a public fountain)</p> |               |

|      |                                                                                                                                                                                                                                                                                                                                                                                                                                                                                                                                                                                                                                                                                                                            |  |  |
|------|----------------------------------------------------------------------------------------------------------------------------------------------------------------------------------------------------------------------------------------------------------------------------------------------------------------------------------------------------------------------------------------------------------------------------------------------------------------------------------------------------------------------------------------------------------------------------------------------------------------------------------------------------------------------------------------------------------------------------|--|--|
|      | <p><sup>d</sup> <b>Tubewell or borehole:</b> a deep hole that has been driven, bored or drilled, to reach groundwater supplies. These are constructed with casing or pipes, which prevent the hole from caving in and protects the water source from run-off water. Water is delivered from a tubewell/borehole through a pump and is protected by a platform around the well to divert spilled water and to protect the well head from runoff water.</p> <p><sup>e</sup> <b>Cart with small tank/drum:</b> water sold by a provider who transports water to the community or facility site</p> <p><sup>f</sup> <b>Tanker-truck:</b> water is trucked into a community or facility site and sold from the water truck.</p> |  |  |
| W2.1 | <p>Is the water service pipe connected to the municipal water system or a private water system?</p> <p><i>If neither, please describe how the water service pipe is connected to the water source.</i></p>                                                                                                                                                                                                                                                                                                                                                                                                                                                                                                                 |  |  |
| W2.2 | <p>What is the cost of connecting the water service pipe to the water system?</p>                                                                                                                                                                                                                                                                                                                                                                                                                                                                                                                                                                                                                                          |  |  |
| W2.3 | <p>What is the monthly or annual utility fee for water service?</p>                                                                                                                                                                                                                                                                                                                                                                                                                                                                                                                                                                                                                                                        |  |  |
| W2.4 | <p>What are the costs associated with installing the water service pipe, water distribution pipes, and pipe fixtures? This includes the cost of labor and materials – e.g., tubing, valves, pressure bladder tank, pressure switch, pipes/fittings, etc.</p> <p>For water piped into the facility, include the cost of any additional equipment and labor needed to connect to the facility's plumbing.</p>                                                                                                                                                                                                                                                                                                                |  |  |
| W2.5 | <p>If an operating theatre exists, does it have a piped water supply directly into the department? If so, is there a provision of both cold and hot water?</p>                                                                                                                                                                                                                                                                                                                                                                                                                                                                                                                                                             |  |  |

|      |                                                                                                                                                                                                                                                                                                                                                                                                                          |  |  |
|------|--------------------------------------------------------------------------------------------------------------------------------------------------------------------------------------------------------------------------------------------------------------------------------------------------------------------------------------------------------------------------------------------------------------------------|--|--|
|      | Does this water undergo further treatment? If so, please describe.                                                                                                                                                                                                                                                                                                                                                       |  |  |
| W2.6 | If an operating theatre exists, what are the additional costs for supplying water to the operation theatre, treating the water, and providing hot water?<br><br>>> <i>Go to W7.1</i>                                                                                                                                                                                                                                     |  |  |
| W3.1 | Is the borehole/tubewell located on the facility's premises?                                                                                                                                                                                                                                                                                                                                                             |  |  |
| W3.2 | Is the borehole/tubewell in working condition?                                                                                                                                                                                                                                                                                                                                                                           |  |  |
| W3.3 | What are the costs associated with installing the borehole or tubewell? This includes the following: <ul style="list-style-type: none"> <li>• Cost of renting a drilling rig and purchasing fuel for the rig</li> <li>• Cost of casing/piping (e.g., concrete lining) and platform around the well head</li> <li>• Cost of pump (e.g., hand, electric, etc.)</li> <li>• Cost of labor</li> </ul><br>>> <i>Go to W7.1</i> |  |  |
| W4.1 | Is water sold by a public or private provider?                                                                                                                                                                                                                                                                                                                                                                           |  |  |
| W4.2 | How does the provider transport the water (e.g., cart with small tank/drum, tanker truck, or other)?                                                                                                                                                                                                                                                                                                                     |  |  |
| W4.3 | Does the provider transport the water directly to the facility's premises or to a community site?                                                                                                                                                                                                                                                                                                                        |  |  |

|      |                                                                                                                                                                                                                                   |  |  |
|------|-----------------------------------------------------------------------------------------------------------------------------------------------------------------------------------------------------------------------------------|--|--|
| W4.4 | If transported to a community site, how is the water then transported to the facility, and what are the associated costs including equipment and labor/staff?                                                                     |  |  |
| W4.5 | How often does the facility purchase water from the provider (e.g., daily, weekly, etc.)?                                                                                                                                         |  |  |
| W4.6 | On average, what is the amount of water the facility purchases from the provider (e.g., daily, weekly, etc.) and what is the cost of purchasing and delivering water?<br><br><i>&gt;&gt; Go to W7.1</i>                           |  |  |
| W5.1 | Is the dugwell located on the premises/in the plot or yard? (Yes/No)<br><br><i>&gt;&gt; If no, go to W7.1</i>                                                                                                                     |  |  |
| W5.2 | What is the cost of constructing the dugwell? This includes the cost of materials (e.g., shovels) and labor.                                                                                                                      |  |  |
| W5.3 | Is the dugwell protected with a well lining/casing raised above ground level, a platform to divert spilled water, AND a cover to protect the well head from run-off water?<br><br><i>&gt;&gt; If no (unprotected), go to W7.1</i> |  |  |
| W5.4 | What is the cost of protecting the dugwell? This includes the cost of materials and labor.                                                                                                                                        |  |  |
| W6.1 | Please describe how water is sourced and transported to the facility.                                                                                                                                                             |  |  |
| W6.2 | What is the cost of obtaining and/or transporting water (e.g. materials, labor, etc.)?                                                                                                                                            |  |  |

|      |                                                                                                                                                                                                                                                                                                                                                                                                                                                                                                                                                     |  |  |
|------|-----------------------------------------------------------------------------------------------------------------------------------------------------------------------------------------------------------------------------------------------------------------------------------------------------------------------------------------------------------------------------------------------------------------------------------------------------------------------------------------------------------------------------------------------------|--|--|
| W7.1 | <p>Does an overhead water storage tank(s) exist on the premises? (Yes/No)</p> <p>If so, specify the <b>type</b>, <b>size</b> and <b>number</b> of storage units.<br/>Examples of storage units include:</p> <ul style="list-style-type: none"> <li>• Jerry cans</li> <li>• Plastic water tank 500-5,000 L</li> <li>• Steel water tank 5,000-10,000 L</li> <li>• Small storage tanks less than 55 (specify size)</li> <li>• Large temporary storage tanks (e.g., bladder tank, onion tank, etc.)</li> </ul> <p>&gt;&gt; <i>If no, go to W8.1</i></p> |  |  |
| W7.2 | Is the overhead tank's capacity sufficient? (Yes/No)                                                                                                                                                                                                                                                                                                                                                                                                                                                                                                |  |  |
| W7.3 | What is the cost per unit for the overhead tank?                                                                                                                                                                                                                                                                                                                                                                                                                                                                                                    |  |  |
| W7.4 | <p>Does a pump for the overhead tank exist? (Yes/No)</p> <p>&gt;&gt; <i>If no, go to W8.1</i></p>                                                                                                                                                                                                                                                                                                                                                                                                                                                   |  |  |
| W7.5 | Is the pump in working condition? (Yes/No)                                                                                                                                                                                                                                                                                                                                                                                                                                                                                                          |  |  |
| W7.6 | What is the cost per unit for the pump?                                                                                                                                                                                                                                                                                                                                                                                                                                                                                                             |  |  |
| W8.1 | Is water supplied to the facility from a safe source free from fecal/faecal contamination?                                                                                                                                                                                                                                                                                                                                                                                                                                                          |  |  |
| W8.2 | Is water supplied to the facility considered low-quality/non-potable or high-quality/potable (e.g., low turbidity and low organic matter)?                                                                                                                                                                                                                                                                                                                                                                                                          |  |  |

|       |                                                                                                                                                                                                                                                         |  |  |
|-------|---------------------------------------------------------------------------------------------------------------------------------------------------------------------------------------------------------------------------------------------------------|--|--|
| W8.3  | Is the quality of the water supplied to the facility monitored regularly, and is there adequate maintenance of water storage and distribution to avoid contamination?                                                                                   |  |  |
| W8.4  | If so, what is the cost of maintaining water safety and protection from decontamination?                                                                                                                                                                |  |  |
| W8.5  | If necessary, can water be treated at the facility?<br><br>>> <i>If no, go to W8.10</i>                                                                                                                                                                 |  |  |
| W8.6  | If water is treated at the facility, please describe the water treatment process (e.g., sedimentation and/or filtration of turbid water, disinfection with chlorine, etc.).                                                                             |  |  |
| W8.7  | What are the costs of the treatment process including materials/equipment and installation?                                                                                                                                                             |  |  |
| W8.8  | Is the treatment process operated effectively? (Yes/No)<br><br>Are there sufficient supplies and adequately trained staff? (Yes/No)<br><br>Is there regular and adequate monitoring of the treatment process and the quality of treated water? (Yes/No) |  |  |
| W8.9  | What are the cost of training/staffing for maintaining operations and monitoring water treatment and quality?                                                                                                                                           |  |  |
| W8.10 | Does water meet WHO guidelines or national standards for safe drinking/potable use? (Yes/No)                                                                                                                                                            |  |  |
| W8.11 | If not, is there a safe alternative supply of drinking-water? (Yes/No)                                                                                                                                                                                  |  |  |



|       |                                                                                                                                                                                                                                                                        |  |  |
|-------|------------------------------------------------------------------------------------------------------------------------------------------------------------------------------------------------------------------------------------------------------------------------|--|--|
|       | <p>If so, please describe.</p> <p>What are the costs of a safe alternative supply of drinking water?</p>                                                                                                                                                               |  |  |
| W8.12 | Is the water supply designed and built so that low-quality (non-potable) water used for cleaning, laundry, etc. cannot enter the potable/drinking water supply?                                                                                                        |  |  |
| W9.1  | <p>Is there sufficient and reliable potable/drinking water available at all times (round-the-clock) for all needs (e.g., drinking, food preparation, personal hygiene, medical use)?</p> <p><i>If no, please explain.</i></p>                                          |  |  |
| W9.2  | <p>Is there sufficient and reliable water available for non-potable use? (Yes/No)</p> <p><i>If no, please explain.</i></p>                                                                                                                                             |  |  |
| W9.3  | <p>Are there 24 hrs of uninterrupted running water supply?</p> <p><i>If no, approximately how many hours of the day is water supply available?</i></p>                                                                                                                 |  |  |
| W10.1 | <p>Is there a drainage/sewage system in place for waste water, surface water, and/or subsoil water? (Yes/No)</p> <p><i>If no, describe how wastewater is disposed or managed if at all.</i><br/> <i>&gt;&gt; then proceed to "Part III. Sanitation facilities"</i></p> |  |  |
| W10.2 | If a drainage system exists, is wastewater removed to an off-site sewer? (Yes/No)                                                                                                                                                                                      |  |  |

|       |                                                                                                                                                                                                                                                      |  |  |
|-------|------------------------------------------------------------------------------------------------------------------------------------------------------------------------------------------------------------------------------------------------------|--|--|
|       | >> <i>If no, go to W10.7</i>                                                                                                                                                                                                                         |  |  |
| W10.3 | Is the drainage/sewage pipe connected to the municipal sewage system or a private sewage system?<br><br><i>If neither, please describe.</i>                                                                                                          |  |  |
| W10.4 | What is the cost of connecting the drainage/sewage pipe to the sewage system?                                                                                                                                                                        |  |  |
| W10.5 | What is the monthly or annual utility fee for sewage disposal service, if any?                                                                                                                                                                       |  |  |
| W10.6 | Are there additional costs associated with installing the drainage/sewage pipes? This includes the cost of labor, maintenance, and equipment – e.g., tubing, valves and fixtures.                                                                    |  |  |
| W10.7 | For on-site wastewater disposal, what type of drainage system is used (e.g., soak-pit)?<br><br>What are the costs associated with construction and maintenance of the drainage system?<br><br>>> <i>Proceed to “Part III. Sanitation facilities”</i> |  |  |

### Part III. Sanitation facilities

*The purpose of the following questions is to determine the type of sanitation facilities used by patients and staff at the healthcare facility, and the costs of constructing and maintaining these sanitation facilities.*

| No. | Question                                                                                                                                                                                                                                                                                                                                                                                                                                                                                                                                                                                                           | Remarks/Notes |
|-----|--------------------------------------------------------------------------------------------------------------------------------------------------------------------------------------------------------------------------------------------------------------------------------------------------------------------------------------------------------------------------------------------------------------------------------------------------------------------------------------------------------------------------------------------------------------------------------------------------------------------|---------------|
| S1  | <p>What type of toilet facility do patients and staff in the facility use?</p> <p>Please circle one of the following:</p> <p>Flush/pour-flush &gt;&gt; <i>Go to S2.1</i></p> <p>Ventilated improved pit latrine (VIP) &gt;&gt; <i>Go to S3.1</i></p> <p>Pit latrine with slab &gt;&gt; <i>Go to S3.1</i></p> <p>Pit latrine without slab/open pit &gt;&gt; <i>Go to S3.1</i></p> <p>Hanging toilet/hanging latrine &gt;&gt; <i>Go to S3.1</i></p> <p>Other: _____ &gt;&gt; <i>Go to S3.1</i></p> <p>No facilities</p> <p>&gt;&gt; <i>If no sanitation facilities exist, proceed to “Part IV. Hand Hygiene”</i></p> |               |

| No.  | Question                                                                                                                                                                                                                 | Answer | Remarks/Notes |
|------|--------------------------------------------------------------------------------------------------------------------------------------------------------------------------------------------------------------------------|--------|---------------|
| S2.1 | What type of flush/pour-flush toilet is used in the facility?                                                                                                                                                            |        |               |
| S2.2 | How many toilets exist in the facility?                                                                                                                                                                                  |        |               |
| S2.3 | Are toilets in working condition? (Yes/No)                                                                                                                                                                               |        |               |
| S2.4 | Are toilets separated for men and women AND for patient and staff? (Yes/No)                                                                                                                                              |        |               |
| S2.5 | What is the ratio of toilets to persons in the facility?<br><br>Does this ratio meet WHO standards of 1 toilet per 20 people? (Yes/No)                                                                                   |        |               |
| S2.6 | What is the cost of installing a single toilet facility including equipment costs and costs of labor?                                                                                                                    |        |               |
| S2.7 | Where does the flush/pour-flush toilet facility flush to?<br><ul style="list-style-type: none"> <li>• Piped sewer system (plumbing)</li> <li>• Septic tank</li> <li>• Pit latrine</li> <li>• Other (describe)</li> </ul> |        |               |
| S2.8 | What is the cost of installing the aforementioned sanitary sewer system? This includes cost of labor and equipment for installation.                                                                                     |        |               |
| S2.9 | What are the costs of maintaining working conditions and cleanliness of sanitation facilities?<br><br>>> <i>Proceed to "Part IV. Hand Hygiene"</i>                                                                       |        |               |
| S3.1 | Describe the type of toilet facility that is used, and the number of facilities available on the premises.                                                                                                               |        |               |

|      |                                                                                                                                                         |  |  |
|------|---------------------------------------------------------------------------------------------------------------------------------------------------------|--|--|
| S3.2 | What are the costs of constructing this type of toilet facility on the premises? This includes the cost of labor and materials.                         |  |  |
| S3.3 | Is there a sewage disposal system in place? (Yes/No)<br>If so, please describe.                                                                         |  |  |
| S3.4 | If a sewage disposal system exists, what are the costs of constructing and maintaining this system?<br><br>>> <i>Proceed to "Part IV. Hand Hygiene"</i> |  |  |

#### Part IV. Hand hygiene

*The purpose of the following questions is to determine the type and availability of hand hygiene stations used by patients and staff at the healthcare facility, and the costs of constructing and maintaining hand hygiene stations.*

| No.  | Question                                                                                                                                                                                                                                                  | Answer | Remarks/Notes |
|------|-----------------------------------------------------------------------------------------------------------------------------------------------------------------------------------------------------------------------------------------------------------|--------|---------------|
| H1.1 | A hand hygiene stations is defined as a basin with water AND soap available. Do hand hygiene stations exist at the facility? (Yes/No)<br><br><i>&gt;&gt; If no hand hygiene stations exist, proceed to "Part V. Environmental Cleaning"</i>               |        |               |
| H2.1 | Are hand hygiene stations located in the facility or outside the facility?                                                                                                                                                                                |        |               |
| H2.2 | How are hand hygiene stations constructed?<br><br>Examples of basins include: <ul style="list-style-type: none"> <li>• Sink/basin with faucet and drain</li> <li>• Bucket with lid, spigot, metal frame, and basin</li> <li>• Other (describe)</li> </ul> |        |               |
| H2.3 | Are the hand hygiene station(s) connected to the facility's plumbing/drainage system? (Yes/No)                                                                                                                                                            |        |               |
| H2.4 | Are hand hygiene stations in working condition? (Yes/No)                                                                                                                                                                                                  |        |               |
| H2.5 | In what form is soap/handwashing detergent available (e.g., bar, liquid or foam)?                                                                                                                                                                         |        |               |
| H2.6 | If a soap bottle dispenser or wall dispenser exists, provide the size/volume and number of dispensers available.                                                                                                                                          |        |               |

| No.  | Question                                                                                                                                                                                                                                                                                                                                                   | Answer | Remarks/Notes |
|------|------------------------------------------------------------------------------------------------------------------------------------------------------------------------------------------------------------------------------------------------------------------------------------------------------------------------------------------------------------|--------|---------------|
| H3.1 | <p>What are the costs of constructing a single hand hygiene station?</p> <p>This should include the cost of:</p> <ul style="list-style-type: none"> <li>• Installation (labor and equipment)</li> <li>• Sink/basin</li> <li>• Connecting to the drainage/plumbing system if applicable</li> <li>• Soap</li> <li>• Soap dispensers if applicable</li> </ul> |        |               |
| H3.2 | Is there a hand hygiene station available within 5 meters of each toilet facility?                                                                                                                                                                                                                                                                         |        |               |
| H3.3 | <p>Point of care is defined as any location where care or treatment is delivered to a patient from a health care worker.</p> <p>Is there a hand hygiene station available at all points of care? (Yes/No)</p>                                                                                                                                              |        |               |
| H3.4 | If inpatient wards exist, what is the ratio of hand hygiene stations to beds?                                                                                                                                                                                                                                                                              |        |               |
| H3.5 | If inpatient wards exist, are there at least 2 hand hygiene stations in wards with 20 or more beds?                                                                                                                                                                                                                                                        |        |               |
| H3.6 | <p>Are there additional hand hygiene materials available at points of care or toilet facilities? If so, please describe the materials and where they are located in the facility (e.g., high-traffic areas, bedside, personal carriage, etc.).</p> <p>Examples of additional materials are:</p>                                                            |        |               |

| No.  | Question                                                                                                                                                                                                                                                                                                                                                                                                                                                                                                                                                                                | Answer | Remarks/Notes |
|------|-----------------------------------------------------------------------------------------------------------------------------------------------------------------------------------------------------------------------------------------------------------------------------------------------------------------------------------------------------------------------------------------------------------------------------------------------------------------------------------------------------------------------------------------------------------------------------------------|--------|---------------|
|      | <ul style="list-style-type: none"> <li>• Antiseptic/Alcohol-based hand-rub (ABHR)</li> <li>• Personal protective equipment gloves</li> <li>• Surgical hand-rub solution</li> <li>• Other (please specify)</li> </ul>                                                                                                                                                                                                                                                                                                                                                                    |        |               |
| H3.7 | If alcohol-based hand-rub exists, is it purchased from a vender or produced in-house?                                                                                                                                                                                                                                                                                                                                                                                                                                                                                                   |        |               |
| H4.1 | <p>If additional hand hygiene materials exist, what are the costs of providing these materials?</p> <p>This should include the itemized cost of:</p> <ul style="list-style-type: none"> <li>• In-house production of ABHR (e.g., supplies and production staff) if applicable</li> <li>• Commercially purchased ABHR</li> <li>• Surgical hand-rub solution</li> <li>• Dispensers for hand-rub solution including type, size/volume, and the number of dispensers</li> <li>• Personal protective equipment gloves</li> </ul> <p>&gt;&gt; Proceed to “Part V. Environmental Cleaning”</p> |        |               |



## Part V. Environmental cleaning

*The purpose of the following questions is to determine the methods and levels of environmental cleaning practiced in the healthcare facility, and the costs of maintaining environmental cleanliness.*

| No.  | Question                                                                                                                                                                                                                                              | Answer | Remarks/Notes |
|------|-------------------------------------------------------------------------------------------------------------------------------------------------------------------------------------------------------------------------------------------------------|--------|---------------|
| E1.1 | Are floors dry swept daily? (Yes/No)<br><br>If so, what is the cost of this activity including equipment (e.g., broom and dustbin) and custodial staff?                                                                                               |        |               |
| E1.2 | Are floors wet mopped daily with detergent? (Yes/No)<br><br>If so, what is the cost of this activity including equipment (e.g., mop and detergent) and custodial staff?                                                                               |        |               |
| E1.3 | Are environmental surfaces (e.g., counters, chairs, tables, etc.) cleaned daily? (Yes/No)<br><br>If so, what is the cost of this activity including equipment (e.g., cloths, surface wipes, disposable napkins, detergent, etc.) and custodial staff? |        |               |
| E1.4 | Are high-touch surfaces and non-critical medical devices (e.g., stethoscope, blood pressure cuff, etc.) cleaned daily with a low-level disinfectant? (Yes/No)<br><br>If so, what is the cost per unit of low-level disinfectant?                      |        |               |
| E2.1 | Is laundry outsourced or washed on-site?                                                                                                                                                                                                              |        |               |

| No.  | Question                                                                                                                                                                                                                                                                                                                                                                                                                  | Answer | Remarks/Notes |
|------|---------------------------------------------------------------------------------------------------------------------------------------------------------------------------------------------------------------------------------------------------------------------------------------------------------------------------------------------------------------------------------------------------------------------------|--------|---------------|
| E2.2 | If outsourced, what is the cost per kilogram of laundry services? And are there additional fees for laundry pick-up and delivery?                                                                                                                                                                                                                                                                                         |        |               |
| E2.3 | On average, how many kilograms of laundry are washed (daily, weekly, etc.)?                                                                                                                                                                                                                                                                                                                                               |        |               |
| E2.4 | If washed on-site by hand, what is the cost of equipment (e.g., laundry detergent, wash basins) and laundry staff to perform these functions?                                                                                                                                                                                                                                                                             |        |               |
| E2.5 | If washed on-site with laundry washer and dryer: <ul style="list-style-type: none"> <li>• What is the cost of laundry detergent?</li> <li>• What is the cost of laundry staff to perform these functions?</li> <li>• What is the cost of a washer, hydroextractor, tumbler, and calendar dryer</li> <li>• What is the cost of installation?</li> <li>• What are the electrical fees for running the equipment?</li> </ul> |        |               |
| E3.1 | How are semi-critical medical devices disinfected (e.g., high-level disinfectant)?                                                                                                                                                                                                                                                                                                                                        |        |               |
| E3.2 | If high-level disinfectant is used, what is the cost of high-level disinfectant solution?                                                                                                                                                                                                                                                                                                                                 |        |               |
|      | How are critical medical devices sterilized?<br>Examples include: <ul style="list-style-type: none"> <li>• Cleaning with soap and water only</li> <li>• Boiling in pot of water</li> </ul>                                                                                                                                                                                                                                |        |               |

| No.  | Question                                                                                                                                                                                                       | Answer | Remarks/Notes |
|------|----------------------------------------------------------------------------------------------------------------------------------------------------------------------------------------------------------------|--------|---------------|
|      | <ul style="list-style-type: none"><li>• Soaking in high-level disinfectant</li><li>• Sterilizing with pressure cooker</li><li>• Sterilizing with steam-pressure autoclave</li><li>• Other (describe)</li></ul> |        |               |
| E3.3 | What is the cost of sterilization including equipment (e.g., pressure cooker, fuel if non-electric, autoclave, etc.) and staffing?                                                                             |        |               |

| E4.2                                                                                                                                                                                                                                                                                                                                                                                                                                                                                                                                                                                                                                                                                                                                                                                                                                                                                                                                                                                                                                                                                                                                                                                                                                                                                                                                                                                                                                                                                                                                                                                                                                                                                                                                                                                                                                                                                                                                                                                                                                                                                                                                                                                                                                                                                                                                                                                                                                                                                                                                                                                                                                                                                                                                                                                                                                                                                                                                                                                                                                                                                                                                                                                                                                                                                                                                                                                                                                                                                                                                                                                                                                                                                                                                                                                                                                                                                                                                                                                                                                                                                                                                                                                                                                                                                                                                                                                                                                                                                                                                                                                                                                                                                                                                                                                                                                                                                                                                                                                                                                                                                                                                                                                                                  | Are the following disposable medical devices/equipment available? |      |          |  |      |      |      |          |                                         |  |  |  |                                                |  |  |  |                                 |  |  |  |                                |  |  |  |                                |  |  |  |                                  |  |  |  |                                 |  |  |  |                                     |  |  |  |                                               |  |  |  |                                                            |  |  |  |                                 |  |  |  |                                  |  |  |  |                                           |  |  |  |                                                              |  |  |  |                                                |  |  |  |                                          |  |  |  |                                                            |  |  |  |                                                                  |  |  |  |                                                         |  |  |  |                                                                                          |  |  |  |                                                         |  |  |  |                                                               |  |  |  |
|-----------------------------------------------------------------------------------------------------------------------------------------------------------------------------------------------------------------------------------------------------------------------------------------------------------------------------------------------------------------------------------------------------------------------------------------------------------------------------------------------------------------------------------------------------------------------------------------------------------------------------------------------------------------------------------------------------------------------------------------------------------------------------------------------------------------------------------------------------------------------------------------------------------------------------------------------------------------------------------------------------------------------------------------------------------------------------------------------------------------------------------------------------------------------------------------------------------------------------------------------------------------------------------------------------------------------------------------------------------------------------------------------------------------------------------------------------------------------------------------------------------------------------------------------------------------------------------------------------------------------------------------------------------------------------------------------------------------------------------------------------------------------------------------------------------------------------------------------------------------------------------------------------------------------------------------------------------------------------------------------------------------------------------------------------------------------------------------------------------------------------------------------------------------------------------------------------------------------------------------------------------------------------------------------------------------------------------------------------------------------------------------------------------------------------------------------------------------------------------------------------------------------------------------------------------------------------------------------------------------------------------------------------------------------------------------------------------------------------------------------------------------------------------------------------------------------------------------------------------------------------------------------------------------------------------------------------------------------------------------------------------------------------------------------------------------------------------------------------------------------------------------------------------------------------------------------------------------------------------------------------------------------------------------------------------------------------------------------------------------------------------------------------------------------------------------------------------------------------------------------------------------------------------------------------------------------------------------------------------------------------------------------------------------------------------------------------------------------------------------------------------------------------------------------------------------------------------------------------------------------------------------------------------------------------------------------------------------------------------------------------------------------------------------------------------------------------------------------------------------------------------------------------------------------------------------------------------------------------------------------------------------------------------------------------------------------------------------------------------------------------------------------------------------------------------------------------------------------------------------------------------------------------------------------------------------------------------------------------------------------------------------------------------------------------------------------------------------------------------------------------------------------------------------------------------------------------------------------------------------------------------------------------------------------------------------------------------------------------------------------------------------------------------------------------------------------------------------------------------------------------------------------------------------------------------------------------------------------|-------------------------------------------------------------------|------|----------|--|------|------|------|----------|-----------------------------------------|--|--|--|------------------------------------------------|--|--|--|---------------------------------|--|--|--|--------------------------------|--|--|--|--------------------------------|--|--|--|----------------------------------|--|--|--|---------------------------------|--|--|--|-------------------------------------|--|--|--|-----------------------------------------------|--|--|--|------------------------------------------------------------|--|--|--|---------------------------------|--|--|--|----------------------------------|--|--|--|-------------------------------------------|--|--|--|--------------------------------------------------------------|--|--|--|------------------------------------------------|--|--|--|------------------------------------------|--|--|--|------------------------------------------------------------|--|--|--|------------------------------------------------------------------|--|--|--|---------------------------------------------------------|--|--|--|------------------------------------------------------------------------------------------|--|--|--|---------------------------------------------------------|--|--|--|---------------------------------------------------------------|--|--|--|
| Check all that apply and provide the cost of each unit item:                                                                                                                                                                                                                                                                                                                                                                                                                                                                                                                                                                                                                                                                                                                                                                                                                                                                                                                                                                                                                                                                                                                                                                                                                                                                                                                                                                                                                                                                                                                                                                                                                                                                                                                                                                                                                                                                                                                                                                                                                                                                                                                                                                                                                                                                                                                                                                                                                                                                                                                                                                                                                                                                                                                                                                                                                                                                                                                                                                                                                                                                                                                                                                                                                                                                                                                                                                                                                                                                                                                                                                                                                                                                                                                                                                                                                                                                                                                                                                                                                                                                                                                                                                                                                                                                                                                                                                                                                                                                                                                                                                                                                                                                                                                                                                                                                                                                                                                                                                                                                                                                                                                                                          |                                                                   |      |          |  |      |      |      |          |                                         |  |  |  |                                                |  |  |  |                                 |  |  |  |                                |  |  |  |                                |  |  |  |                                  |  |  |  |                                 |  |  |  |                                     |  |  |  |                                               |  |  |  |                                                            |  |  |  |                                 |  |  |  |                                  |  |  |  |                                           |  |  |  |                                                              |  |  |  |                                                |  |  |  |                                          |  |  |  |                                                            |  |  |  |                                                                  |  |  |  |                                                         |  |  |  |                                                                                          |  |  |  |                                                         |  |  |  |                                                               |  |  |  |
| <table border="1"> <thead> <tr> <th data-bbox="401 389 997 422">Item</th> <th data-bbox="997 389 1165 422">Cost</th> <th data-bbox="1165 389 1333 422">Unit</th> <th data-bbox="1333 389 1522 422">Quantity</th> </tr> </thead> <tbody> <tr> <td data-bbox="401 430 997 462"><input type="checkbox"/> Sterile gloves</td> <td data-bbox="997 430 1165 462"></td> <td data-bbox="1165 430 1333 462"></td> <td data-bbox="1333 430 1522 462"></td> </tr> <tr> <td data-bbox="401 470 997 503"><input type="checkbox"/> Latex surgical gloves</td> <td data-bbox="997 470 1165 503"></td> <td data-bbox="1165 470 1333 503"></td> <td data-bbox="1333 470 1522 503"></td> </tr> <tr> <td data-bbox="401 511 997 544"><input type="checkbox"/> Drapes</td> <td data-bbox="997 511 1165 544"></td> <td data-bbox="1165 511 1333 544"></td> <td data-bbox="1333 511 1522 544"></td> </tr> <tr> <td data-bbox="401 552 997 584"><input type="checkbox"/> Gowns</td> <td data-bbox="997 552 1165 584"></td> <td data-bbox="1165 552 1333 584"></td> <td data-bbox="1333 552 1522 584"></td> </tr> <tr> <td data-bbox="401 592 997 625"><input type="checkbox"/> Masks</td> <td data-bbox="997 592 1165 625"></td> <td data-bbox="1165 592 1333 625"></td> <td data-bbox="1333 592 1522 625"></td> </tr> <tr> <td data-bbox="401 633 997 665"><input type="checkbox"/> Forceps</td> <td data-bbox="997 633 1165 665"></td> <td data-bbox="1165 633 1333 665"></td> <td data-bbox="1333 633 1522 665"></td> </tr> <tr> <td data-bbox="401 673 997 706"><input type="checkbox"/> Blades</td> <td data-bbox="997 673 1165 706"></td> <td data-bbox="1165 673 1333 706"></td> <td data-bbox="1333 673 1522 706"></td> </tr> <tr> <td data-bbox="401 714 997 747"><input type="checkbox"/> Cord clamp</td> <td data-bbox="997 714 1165 747"></td> <td data-bbox="1165 714 1333 747"></td> <td data-bbox="1333 714 1522 747"></td> </tr> <tr> <td data-bbox="401 755 997 787"><input type="checkbox"/> Dee Lee's mucus trap</td> <td data-bbox="997 755 1165 787"></td> <td data-bbox="1165 755 1333 787"></td> <td data-bbox="1333 755 1522 787"></td> </tr> <tr> <td data-bbox="401 795 997 828"><input type="checkbox"/> Intravenous catheters (e.g., 24G)</td> <td data-bbox="997 795 1165 828"></td> <td data-bbox="1165 795 1333 828"></td> <td data-bbox="1333 795 1522 828"></td> </tr> <tr> <td data-bbox="401 836 997 868"><input type="checkbox"/> Tubing</td> <td data-bbox="997 836 1165 868"></td> <td data-bbox="1165 836 1333 868"></td> <td data-bbox="1333 836 1522 868"></td> </tr> <tr> <td data-bbox="401 876 997 909"><input type="checkbox"/> IV sets</td> <td data-bbox="997 876 1165 909"></td> <td data-bbox="1165 876 1333 909"></td> <td data-bbox="1333 876 1522 909"></td> </tr> <tr> <td data-bbox="401 917 997 950"><input type="checkbox"/> Clean birth kits</td> <td data-bbox="997 917 1165 950"></td> <td data-bbox="1165 917 1333 950"></td> <td data-bbox="1333 917 1522 950"></td> </tr> <tr> <td data-bbox="401 958 997 990"><input type="checkbox"/> Micro drip set with/without burette</td> <td data-bbox="997 958 1165 990"></td> <td data-bbox="1165 958 1333 990"></td> <td data-bbox="1333 958 1522 990"></td> </tr> <tr> <td data-bbox="401 998 997 1031"><input type="checkbox"/> Blood transfusion set</td> <td data-bbox="997 998 1165 1031"></td> <td data-bbox="1165 998 1333 1031"></td> <td data-bbox="1333 998 1522 1031"></td> </tr> <tr> <td data-bbox="401 1039 997 1071"><input type="checkbox"/> 3-way stop cock</td> <td data-bbox="997 1039 1165 1071"></td> <td data-bbox="1165 1039 1333 1071"></td> <td data-bbox="1333 1039 1522 1071"></td> </tr> <tr> <td data-bbox="401 1079 997 1112"><input type="checkbox"/> Suction catheter size # 10, 12 Fr</td> <td data-bbox="997 1079 1165 1112"></td> <td data-bbox="1165 1079 1333 1112"></td> <td data-bbox="1333 1079 1522 1112"></td> </tr> <tr> <td data-bbox="401 1120 997 1153"><input type="checkbox"/> Endotracheal tube size # 2.5, 3, 3.5 mm</td> <td data-bbox="997 1120 1165 1153"></td> <td data-bbox="1165 1120 1333 1153"></td> <td data-bbox="1333 1120 1522 1153"></td> </tr> <tr> <td data-bbox="401 1161 997 1193"><input type="checkbox"/> Feeding tube size # 5, 6, 7 Fr</td> <td data-bbox="997 1161 1165 1193"></td> <td data-bbox="1165 1161 1333 1193"></td> <td data-bbox="1333 1161 1522 1193"></td> </tr> <tr> <td data-bbox="401 1201 997 1266"><input type="checkbox"/> Tuberculin syringes 1, 2, 5, 10, 50 cc with 22, 24, 26 G needle</td> <td data-bbox="997 1201 1165 1266"></td> <td data-bbox="1165 1201 1333 1266"></td> <td data-bbox="1333 1201 1522 1266"></td> </tr> <tr> <td data-bbox="401 1274 997 1307"><input type="checkbox"/> Glucostic and multistix strips</td> <td data-bbox="997 1274 1165 1307"></td> <td data-bbox="1165 1274 1333 1307"></td> <td data-bbox="1333 1274 1522 1307"></td> </tr> <tr> <td data-bbox="401 1315 997 1339"><input type="checkbox"/> Capillary tubes for microhaematocrit</td> <td data-bbox="997 1315 1165 1339"></td> <td data-bbox="1165 1315 1333 1339"></td> <td data-bbox="1333 1315 1522 1339"></td> </tr> </tbody> </table> |                                                                   |      |          |  | Item | Cost | Unit | Quantity | <input type="checkbox"/> Sterile gloves |  |  |  | <input type="checkbox"/> Latex surgical gloves |  |  |  | <input type="checkbox"/> Drapes |  |  |  | <input type="checkbox"/> Gowns |  |  |  | <input type="checkbox"/> Masks |  |  |  | <input type="checkbox"/> Forceps |  |  |  | <input type="checkbox"/> Blades |  |  |  | <input type="checkbox"/> Cord clamp |  |  |  | <input type="checkbox"/> Dee Lee's mucus trap |  |  |  | <input type="checkbox"/> Intravenous catheters (e.g., 24G) |  |  |  | <input type="checkbox"/> Tubing |  |  |  | <input type="checkbox"/> IV sets |  |  |  | <input type="checkbox"/> Clean birth kits |  |  |  | <input type="checkbox"/> Micro drip set with/without burette |  |  |  | <input type="checkbox"/> Blood transfusion set |  |  |  | <input type="checkbox"/> 3-way stop cock |  |  |  | <input type="checkbox"/> Suction catheter size # 10, 12 Fr |  |  |  | <input type="checkbox"/> Endotracheal tube size # 2.5, 3, 3.5 mm |  |  |  | <input type="checkbox"/> Feeding tube size # 5, 6, 7 Fr |  |  |  | <input type="checkbox"/> Tuberculin syringes 1, 2, 5, 10, 50 cc with 22, 24, 26 G needle |  |  |  | <input type="checkbox"/> Glucostic and multistix strips |  |  |  | <input type="checkbox"/> Capillary tubes for microhaematocrit |  |  |  |
| Item                                                                                                                                                                                                                                                                                                                                                                                                                                                                                                                                                                                                                                                                                                                                                                                                                                                                                                                                                                                                                                                                                                                                                                                                                                                                                                                                                                                                                                                                                                                                                                                                                                                                                                                                                                                                                                                                                                                                                                                                                                                                                                                                                                                                                                                                                                                                                                                                                                                                                                                                                                                                                                                                                                                                                                                                                                                                                                                                                                                                                                                                                                                                                                                                                                                                                                                                                                                                                                                                                                                                                                                                                                                                                                                                                                                                                                                                                                                                                                                                                                                                                                                                                                                                                                                                                                                                                                                                                                                                                                                                                                                                                                                                                                                                                                                                                                                                                                                                                                                                                                                                                                                                                                                                                  | Cost                                                              | Unit | Quantity |  |      |      |      |          |                                         |  |  |  |                                                |  |  |  |                                 |  |  |  |                                |  |  |  |                                |  |  |  |                                  |  |  |  |                                 |  |  |  |                                     |  |  |  |                                               |  |  |  |                                                            |  |  |  |                                 |  |  |  |                                  |  |  |  |                                           |  |  |  |                                                              |  |  |  |                                                |  |  |  |                                          |  |  |  |                                                            |  |  |  |                                                                  |  |  |  |                                                         |  |  |  |                                                                                          |  |  |  |                                                         |  |  |  |                                                               |  |  |  |
| <input type="checkbox"/> Sterile gloves                                                                                                                                                                                                                                                                                                                                                                                                                                                                                                                                                                                                                                                                                                                                                                                                                                                                                                                                                                                                                                                                                                                                                                                                                                                                                                                                                                                                                                                                                                                                                                                                                                                                                                                                                                                                                                                                                                                                                                                                                                                                                                                                                                                                                                                                                                                                                                                                                                                                                                                                                                                                                                                                                                                                                                                                                                                                                                                                                                                                                                                                                                                                                                                                                                                                                                                                                                                                                                                                                                                                                                                                                                                                                                                                                                                                                                                                                                                                                                                                                                                                                                                                                                                                                                                                                                                                                                                                                                                                                                                                                                                                                                                                                                                                                                                                                                                                                                                                                                                                                                                                                                                                                                               |                                                                   |      |          |  |      |      |      |          |                                         |  |  |  |                                                |  |  |  |                                 |  |  |  |                                |  |  |  |                                |  |  |  |                                  |  |  |  |                                 |  |  |  |                                     |  |  |  |                                               |  |  |  |                                                            |  |  |  |                                 |  |  |  |                                  |  |  |  |                                           |  |  |  |                                                              |  |  |  |                                                |  |  |  |                                          |  |  |  |                                                            |  |  |  |                                                                  |  |  |  |                                                         |  |  |  |                                                                                          |  |  |  |                                                         |  |  |  |                                                               |  |  |  |
| <input type="checkbox"/> Latex surgical gloves                                                                                                                                                                                                                                                                                                                                                                                                                                                                                                                                                                                                                                                                                                                                                                                                                                                                                                                                                                                                                                                                                                                                                                                                                                                                                                                                                                                                                                                                                                                                                                                                                                                                                                                                                                                                                                                                                                                                                                                                                                                                                                                                                                                                                                                                                                                                                                                                                                                                                                                                                                                                                                                                                                                                                                                                                                                                                                                                                                                                                                                                                                                                                                                                                                                                                                                                                                                                                                                                                                                                                                                                                                                                                                                                                                                                                                                                                                                                                                                                                                                                                                                                                                                                                                                                                                                                                                                                                                                                                                                                                                                                                                                                                                                                                                                                                                                                                                                                                                                                                                                                                                                                                                        |                                                                   |      |          |  |      |      |      |          |                                         |  |  |  |                                                |  |  |  |                                 |  |  |  |                                |  |  |  |                                |  |  |  |                                  |  |  |  |                                 |  |  |  |                                     |  |  |  |                                               |  |  |  |                                                            |  |  |  |                                 |  |  |  |                                  |  |  |  |                                           |  |  |  |                                                              |  |  |  |                                                |  |  |  |                                          |  |  |  |                                                            |  |  |  |                                                                  |  |  |  |                                                         |  |  |  |                                                                                          |  |  |  |                                                         |  |  |  |                                                               |  |  |  |
| <input type="checkbox"/> Drapes                                                                                                                                                                                                                                                                                                                                                                                                                                                                                                                                                                                                                                                                                                                                                                                                                                                                                                                                                                                                                                                                                                                                                                                                                                                                                                                                                                                                                                                                                                                                                                                                                                                                                                                                                                                                                                                                                                                                                                                                                                                                                                                                                                                                                                                                                                                                                                                                                                                                                                                                                                                                                                                                                                                                                                                                                                                                                                                                                                                                                                                                                                                                                                                                                                                                                                                                                                                                                                                                                                                                                                                                                                                                                                                                                                                                                                                                                                                                                                                                                                                                                                                                                                                                                                                                                                                                                                                                                                                                                                                                                                                                                                                                                                                                                                                                                                                                                                                                                                                                                                                                                                                                                                                       |                                                                   |      |          |  |      |      |      |          |                                         |  |  |  |                                                |  |  |  |                                 |  |  |  |                                |  |  |  |                                |  |  |  |                                  |  |  |  |                                 |  |  |  |                                     |  |  |  |                                               |  |  |  |                                                            |  |  |  |                                 |  |  |  |                                  |  |  |  |                                           |  |  |  |                                                              |  |  |  |                                                |  |  |  |                                          |  |  |  |                                                            |  |  |  |                                                                  |  |  |  |                                                         |  |  |  |                                                                                          |  |  |  |                                                         |  |  |  |                                                               |  |  |  |
| <input type="checkbox"/> Gowns                                                                                                                                                                                                                                                                                                                                                                                                                                                                                                                                                                                                                                                                                                                                                                                                                                                                                                                                                                                                                                                                                                                                                                                                                                                                                                                                                                                                                                                                                                                                                                                                                                                                                                                                                                                                                                                                                                                                                                                                                                                                                                                                                                                                                                                                                                                                                                                                                                                                                                                                                                                                                                                                                                                                                                                                                                                                                                                                                                                                                                                                                                                                                                                                                                                                                                                                                                                                                                                                                                                                                                                                                                                                                                                                                                                                                                                                                                                                                                                                                                                                                                                                                                                                                                                                                                                                                                                                                                                                                                                                                                                                                                                                                                                                                                                                                                                                                                                                                                                                                                                                                                                                                                                        |                                                                   |      |          |  |      |      |      |          |                                         |  |  |  |                                                |  |  |  |                                 |  |  |  |                                |  |  |  |                                |  |  |  |                                  |  |  |  |                                 |  |  |  |                                     |  |  |  |                                               |  |  |  |                                                            |  |  |  |                                 |  |  |  |                                  |  |  |  |                                           |  |  |  |                                                              |  |  |  |                                                |  |  |  |                                          |  |  |  |                                                            |  |  |  |                                                                  |  |  |  |                                                         |  |  |  |                                                                                          |  |  |  |                                                         |  |  |  |                                                               |  |  |  |
| <input type="checkbox"/> Masks                                                                                                                                                                                                                                                                                                                                                                                                                                                                                                                                                                                                                                                                                                                                                                                                                                                                                                                                                                                                                                                                                                                                                                                                                                                                                                                                                                                                                                                                                                                                                                                                                                                                                                                                                                                                                                                                                                                                                                                                                                                                                                                                                                                                                                                                                                                                                                                                                                                                                                                                                                                                                                                                                                                                                                                                                                                                                                                                                                                                                                                                                                                                                                                                                                                                                                                                                                                                                                                                                                                                                                                                                                                                                                                                                                                                                                                                                                                                                                                                                                                                                                                                                                                                                                                                                                                                                                                                                                                                                                                                                                                                                                                                                                                                                                                                                                                                                                                                                                                                                                                                                                                                                                                        |                                                                   |      |          |  |      |      |      |          |                                         |  |  |  |                                                |  |  |  |                                 |  |  |  |                                |  |  |  |                                |  |  |  |                                  |  |  |  |                                 |  |  |  |                                     |  |  |  |                                               |  |  |  |                                                            |  |  |  |                                 |  |  |  |                                  |  |  |  |                                           |  |  |  |                                                              |  |  |  |                                                |  |  |  |                                          |  |  |  |                                                            |  |  |  |                                                                  |  |  |  |                                                         |  |  |  |                                                                                          |  |  |  |                                                         |  |  |  |                                                               |  |  |  |
| <input type="checkbox"/> Forceps                                                                                                                                                                                                                                                                                                                                                                                                                                                                                                                                                                                                                                                                                                                                                                                                                                                                                                                                                                                                                                                                                                                                                                                                                                                                                                                                                                                                                                                                                                                                                                                                                                                                                                                                                                                                                                                                                                                                                                                                                                                                                                                                                                                                                                                                                                                                                                                                                                                                                                                                                                                                                                                                                                                                                                                                                                                                                                                                                                                                                                                                                                                                                                                                                                                                                                                                                                                                                                                                                                                                                                                                                                                                                                                                                                                                                                                                                                                                                                                                                                                                                                                                                                                                                                                                                                                                                                                                                                                                                                                                                                                                                                                                                                                                                                                                                                                                                                                                                                                                                                                                                                                                                                                      |                                                                   |      |          |  |      |      |      |          |                                         |  |  |  |                                                |  |  |  |                                 |  |  |  |                                |  |  |  |                                |  |  |  |                                  |  |  |  |                                 |  |  |  |                                     |  |  |  |                                               |  |  |  |                                                            |  |  |  |                                 |  |  |  |                                  |  |  |  |                                           |  |  |  |                                                              |  |  |  |                                                |  |  |  |                                          |  |  |  |                                                            |  |  |  |                                                                  |  |  |  |                                                         |  |  |  |                                                                                          |  |  |  |                                                         |  |  |  |                                                               |  |  |  |
| <input type="checkbox"/> Blades                                                                                                                                                                                                                                                                                                                                                                                                                                                                                                                                                                                                                                                                                                                                                                                                                                                                                                                                                                                                                                                                                                                                                                                                                                                                                                                                                                                                                                                                                                                                                                                                                                                                                                                                                                                                                                                                                                                                                                                                                                                                                                                                                                                                                                                                                                                                                                                                                                                                                                                                                                                                                                                                                                                                                                                                                                                                                                                                                                                                                                                                                                                                                                                                                                                                                                                                                                                                                                                                                                                                                                                                                                                                                                                                                                                                                                                                                                                                                                                                                                                                                                                                                                                                                                                                                                                                                                                                                                                                                                                                                                                                                                                                                                                                                                                                                                                                                                                                                                                                                                                                                                                                                                                       |                                                                   |      |          |  |      |      |      |          |                                         |  |  |  |                                                |  |  |  |                                 |  |  |  |                                |  |  |  |                                |  |  |  |                                  |  |  |  |                                 |  |  |  |                                     |  |  |  |                                               |  |  |  |                                                            |  |  |  |                                 |  |  |  |                                  |  |  |  |                                           |  |  |  |                                                              |  |  |  |                                                |  |  |  |                                          |  |  |  |                                                            |  |  |  |                                                                  |  |  |  |                                                         |  |  |  |                                                                                          |  |  |  |                                                         |  |  |  |                                                               |  |  |  |
| <input type="checkbox"/> Cord clamp                                                                                                                                                                                                                                                                                                                                                                                                                                                                                                                                                                                                                                                                                                                                                                                                                                                                                                                                                                                                                                                                                                                                                                                                                                                                                                                                                                                                                                                                                                                                                                                                                                                                                                                                                                                                                                                                                                                                                                                                                                                                                                                                                                                                                                                                                                                                                                                                                                                                                                                                                                                                                                                                                                                                                                                                                                                                                                                                                                                                                                                                                                                                                                                                                                                                                                                                                                                                                                                                                                                                                                                                                                                                                                                                                                                                                                                                                                                                                                                                                                                                                                                                                                                                                                                                                                                                                                                                                                                                                                                                                                                                                                                                                                                                                                                                                                                                                                                                                                                                                                                                                                                                                                                   |                                                                   |      |          |  |      |      |      |          |                                         |  |  |  |                                                |  |  |  |                                 |  |  |  |                                |  |  |  |                                |  |  |  |                                  |  |  |  |                                 |  |  |  |                                     |  |  |  |                                               |  |  |  |                                                            |  |  |  |                                 |  |  |  |                                  |  |  |  |                                           |  |  |  |                                                              |  |  |  |                                                |  |  |  |                                          |  |  |  |                                                            |  |  |  |                                                                  |  |  |  |                                                         |  |  |  |                                                                                          |  |  |  |                                                         |  |  |  |                                                               |  |  |  |
| <input type="checkbox"/> Dee Lee's mucus trap                                                                                                                                                                                                                                                                                                                                                                                                                                                                                                                                                                                                                                                                                                                                                                                                                                                                                                                                                                                                                                                                                                                                                                                                                                                                                                                                                                                                                                                                                                                                                                                                                                                                                                                                                                                                                                                                                                                                                                                                                                                                                                                                                                                                                                                                                                                                                                                                                                                                                                                                                                                                                                                                                                                                                                                                                                                                                                                                                                                                                                                                                                                                                                                                                                                                                                                                                                                                                                                                                                                                                                                                                                                                                                                                                                                                                                                                                                                                                                                                                                                                                                                                                                                                                                                                                                                                                                                                                                                                                                                                                                                                                                                                                                                                                                                                                                                                                                                                                                                                                                                                                                                                                                         |                                                                   |      |          |  |      |      |      |          |                                         |  |  |  |                                                |  |  |  |                                 |  |  |  |                                |  |  |  |                                |  |  |  |                                  |  |  |  |                                 |  |  |  |                                     |  |  |  |                                               |  |  |  |                                                            |  |  |  |                                 |  |  |  |                                  |  |  |  |                                           |  |  |  |                                                              |  |  |  |                                                |  |  |  |                                          |  |  |  |                                                            |  |  |  |                                                                  |  |  |  |                                                         |  |  |  |                                                                                          |  |  |  |                                                         |  |  |  |                                                               |  |  |  |
| <input type="checkbox"/> Intravenous catheters (e.g., 24G)                                                                                                                                                                                                                                                                                                                                                                                                                                                                                                                                                                                                                                                                                                                                                                                                                                                                                                                                                                                                                                                                                                                                                                                                                                                                                                                                                                                                                                                                                                                                                                                                                                                                                                                                                                                                                                                                                                                                                                                                                                                                                                                                                                                                                                                                                                                                                                                                                                                                                                                                                                                                                                                                                                                                                                                                                                                                                                                                                                                                                                                                                                                                                                                                                                                                                                                                                                                                                                                                                                                                                                                                                                                                                                                                                                                                                                                                                                                                                                                                                                                                                                                                                                                                                                                                                                                                                                                                                                                                                                                                                                                                                                                                                                                                                                                                                                                                                                                                                                                                                                                                                                                                                            |                                                                   |      |          |  |      |      |      |          |                                         |  |  |  |                                                |  |  |  |                                 |  |  |  |                                |  |  |  |                                |  |  |  |                                  |  |  |  |                                 |  |  |  |                                     |  |  |  |                                               |  |  |  |                                                            |  |  |  |                                 |  |  |  |                                  |  |  |  |                                           |  |  |  |                                                              |  |  |  |                                                |  |  |  |                                          |  |  |  |                                                            |  |  |  |                                                                  |  |  |  |                                                         |  |  |  |                                                                                          |  |  |  |                                                         |  |  |  |                                                               |  |  |  |
| <input type="checkbox"/> Tubing                                                                                                                                                                                                                                                                                                                                                                                                                                                                                                                                                                                                                                                                                                                                                                                                                                                                                                                                                                                                                                                                                                                                                                                                                                                                                                                                                                                                                                                                                                                                                                                                                                                                                                                                                                                                                                                                                                                                                                                                                                                                                                                                                                                                                                                                                                                                                                                                                                                                                                                                                                                                                                                                                                                                                                                                                                                                                                                                                                                                                                                                                                                                                                                                                                                                                                                                                                                                                                                                                                                                                                                                                                                                                                                                                                                                                                                                                                                                                                                                                                                                                                                                                                                                                                                                                                                                                                                                                                                                                                                                                                                                                                                                                                                                                                                                                                                                                                                                                                                                                                                                                                                                                                                       |                                                                   |      |          |  |      |      |      |          |                                         |  |  |  |                                                |  |  |  |                                 |  |  |  |                                |  |  |  |                                |  |  |  |                                  |  |  |  |                                 |  |  |  |                                     |  |  |  |                                               |  |  |  |                                                            |  |  |  |                                 |  |  |  |                                  |  |  |  |                                           |  |  |  |                                                              |  |  |  |                                                |  |  |  |                                          |  |  |  |                                                            |  |  |  |                                                                  |  |  |  |                                                         |  |  |  |                                                                                          |  |  |  |                                                         |  |  |  |                                                               |  |  |  |
| <input type="checkbox"/> IV sets                                                                                                                                                                                                                                                                                                                                                                                                                                                                                                                                                                                                                                                                                                                                                                                                                                                                                                                                                                                                                                                                                                                                                                                                                                                                                                                                                                                                                                                                                                                                                                                                                                                                                                                                                                                                                                                                                                                                                                                                                                                                                                                                                                                                                                                                                                                                                                                                                                                                                                                                                                                                                                                                                                                                                                                                                                                                                                                                                                                                                                                                                                                                                                                                                                                                                                                                                                                                                                                                                                                                                                                                                                                                                                                                                                                                                                                                                                                                                                                                                                                                                                                                                                                                                                                                                                                                                                                                                                                                                                                                                                                                                                                                                                                                                                                                                                                                                                                                                                                                                                                                                                                                                                                      |                                                                   |      |          |  |      |      |      |          |                                         |  |  |  |                                                |  |  |  |                                 |  |  |  |                                |  |  |  |                                |  |  |  |                                  |  |  |  |                                 |  |  |  |                                     |  |  |  |                                               |  |  |  |                                                            |  |  |  |                                 |  |  |  |                                  |  |  |  |                                           |  |  |  |                                                              |  |  |  |                                                |  |  |  |                                          |  |  |  |                                                            |  |  |  |                                                                  |  |  |  |                                                         |  |  |  |                                                                                          |  |  |  |                                                         |  |  |  |                                                               |  |  |  |
| <input type="checkbox"/> Clean birth kits                                                                                                                                                                                                                                                                                                                                                                                                                                                                                                                                                                                                                                                                                                                                                                                                                                                                                                                                                                                                                                                                                                                                                                                                                                                                                                                                                                                                                                                                                                                                                                                                                                                                                                                                                                                                                                                                                                                                                                                                                                                                                                                                                                                                                                                                                                                                                                                                                                                                                                                                                                                                                                                                                                                                                                                                                                                                                                                                                                                                                                                                                                                                                                                                                                                                                                                                                                                                                                                                                                                                                                                                                                                                                                                                                                                                                                                                                                                                                                                                                                                                                                                                                                                                                                                                                                                                                                                                                                                                                                                                                                                                                                                                                                                                                                                                                                                                                                                                                                                                                                                                                                                                                                             |                                                                   |      |          |  |      |      |      |          |                                         |  |  |  |                                                |  |  |  |                                 |  |  |  |                                |  |  |  |                                |  |  |  |                                  |  |  |  |                                 |  |  |  |                                     |  |  |  |                                               |  |  |  |                                                            |  |  |  |                                 |  |  |  |                                  |  |  |  |                                           |  |  |  |                                                              |  |  |  |                                                |  |  |  |                                          |  |  |  |                                                            |  |  |  |                                                                  |  |  |  |                                                         |  |  |  |                                                                                          |  |  |  |                                                         |  |  |  |                                                               |  |  |  |
| <input type="checkbox"/> Micro drip set with/without burette                                                                                                                                                                                                                                                                                                                                                                                                                                                                                                                                                                                                                                                                                                                                                                                                                                                                                                                                                                                                                                                                                                                                                                                                                                                                                                                                                                                                                                                                                                                                                                                                                                                                                                                                                                                                                                                                                                                                                                                                                                                                                                                                                                                                                                                                                                                                                                                                                                                                                                                                                                                                                                                                                                                                                                                                                                                                                                                                                                                                                                                                                                                                                                                                                                                                                                                                                                                                                                                                                                                                                                                                                                                                                                                                                                                                                                                                                                                                                                                                                                                                                                                                                                                                                                                                                                                                                                                                                                                                                                                                                                                                                                                                                                                                                                                                                                                                                                                                                                                                                                                                                                                                                          |                                                                   |      |          |  |      |      |      |          |                                         |  |  |  |                                                |  |  |  |                                 |  |  |  |                                |  |  |  |                                |  |  |  |                                  |  |  |  |                                 |  |  |  |                                     |  |  |  |                                               |  |  |  |                                                            |  |  |  |                                 |  |  |  |                                  |  |  |  |                                           |  |  |  |                                                              |  |  |  |                                                |  |  |  |                                          |  |  |  |                                                            |  |  |  |                                                                  |  |  |  |                                                         |  |  |  |                                                                                          |  |  |  |                                                         |  |  |  |                                                               |  |  |  |
| <input type="checkbox"/> Blood transfusion set                                                                                                                                                                                                                                                                                                                                                                                                                                                                                                                                                                                                                                                                                                                                                                                                                                                                                                                                                                                                                                                                                                                                                                                                                                                                                                                                                                                                                                                                                                                                                                                                                                                                                                                                                                                                                                                                                                                                                                                                                                                                                                                                                                                                                                                                                                                                                                                                                                                                                                                                                                                                                                                                                                                                                                                                                                                                                                                                                                                                                                                                                                                                                                                                                                                                                                                                                                                                                                                                                                                                                                                                                                                                                                                                                                                                                                                                                                                                                                                                                                                                                                                                                                                                                                                                                                                                                                                                                                                                                                                                                                                                                                                                                                                                                                                                                                                                                                                                                                                                                                                                                                                                                                        |                                                                   |      |          |  |      |      |      |          |                                         |  |  |  |                                                |  |  |  |                                 |  |  |  |                                |  |  |  |                                |  |  |  |                                  |  |  |  |                                 |  |  |  |                                     |  |  |  |                                               |  |  |  |                                                            |  |  |  |                                 |  |  |  |                                  |  |  |  |                                           |  |  |  |                                                              |  |  |  |                                                |  |  |  |                                          |  |  |  |                                                            |  |  |  |                                                                  |  |  |  |                                                         |  |  |  |                                                                                          |  |  |  |                                                         |  |  |  |                                                               |  |  |  |
| <input type="checkbox"/> 3-way stop cock                                                                                                                                                                                                                                                                                                                                                                                                                                                                                                                                                                                                                                                                                                                                                                                                                                                                                                                                                                                                                                                                                                                                                                                                                                                                                                                                                                                                                                                                                                                                                                                                                                                                                                                                                                                                                                                                                                                                                                                                                                                                                                                                                                                                                                                                                                                                                                                                                                                                                                                                                                                                                                                                                                                                                                                                                                                                                                                                                                                                                                                                                                                                                                                                                                                                                                                                                                                                                                                                                                                                                                                                                                                                                                                                                                                                                                                                                                                                                                                                                                                                                                                                                                                                                                                                                                                                                                                                                                                                                                                                                                                                                                                                                                                                                                                                                                                                                                                                                                                                                                                                                                                                                                              |                                                                   |      |          |  |      |      |      |          |                                         |  |  |  |                                                |  |  |  |                                 |  |  |  |                                |  |  |  |                                |  |  |  |                                  |  |  |  |                                 |  |  |  |                                     |  |  |  |                                               |  |  |  |                                                            |  |  |  |                                 |  |  |  |                                  |  |  |  |                                           |  |  |  |                                                              |  |  |  |                                                |  |  |  |                                          |  |  |  |                                                            |  |  |  |                                                                  |  |  |  |                                                         |  |  |  |                                                                                          |  |  |  |                                                         |  |  |  |                                                               |  |  |  |
| <input type="checkbox"/> Suction catheter size # 10, 12 Fr                                                                                                                                                                                                                                                                                                                                                                                                                                                                                                                                                                                                                                                                                                                                                                                                                                                                                                                                                                                                                                                                                                                                                                                                                                                                                                                                                                                                                                                                                                                                                                                                                                                                                                                                                                                                                                                                                                                                                                                                                                                                                                                                                                                                                                                                                                                                                                                                                                                                                                                                                                                                                                                                                                                                                                                                                                                                                                                                                                                                                                                                                                                                                                                                                                                                                                                                                                                                                                                                                                                                                                                                                                                                                                                                                                                                                                                                                                                                                                                                                                                                                                                                                                                                                                                                                                                                                                                                                                                                                                                                                                                                                                                                                                                                                                                                                                                                                                                                                                                                                                                                                                                                                            |                                                                   |      |          |  |      |      |      |          |                                         |  |  |  |                                                |  |  |  |                                 |  |  |  |                                |  |  |  |                                |  |  |  |                                  |  |  |  |                                 |  |  |  |                                     |  |  |  |                                               |  |  |  |                                                            |  |  |  |                                 |  |  |  |                                  |  |  |  |                                           |  |  |  |                                                              |  |  |  |                                                |  |  |  |                                          |  |  |  |                                                            |  |  |  |                                                                  |  |  |  |                                                         |  |  |  |                                                                                          |  |  |  |                                                         |  |  |  |                                                               |  |  |  |
| <input type="checkbox"/> Endotracheal tube size # 2.5, 3, 3.5 mm                                                                                                                                                                                                                                                                                                                                                                                                                                                                                                                                                                                                                                                                                                                                                                                                                                                                                                                                                                                                                                                                                                                                                                                                                                                                                                                                                                                                                                                                                                                                                                                                                                                                                                                                                                                                                                                                                                                                                                                                                                                                                                                                                                                                                                                                                                                                                                                                                                                                                                                                                                                                                                                                                                                                                                                                                                                                                                                                                                                                                                                                                                                                                                                                                                                                                                                                                                                                                                                                                                                                                                                                                                                                                                                                                                                                                                                                                                                                                                                                                                                                                                                                                                                                                                                                                                                                                                                                                                                                                                                                                                                                                                                                                                                                                                                                                                                                                                                                                                                                                                                                                                                                                      |                                                                   |      |          |  |      |      |      |          |                                         |  |  |  |                                                |  |  |  |                                 |  |  |  |                                |  |  |  |                                |  |  |  |                                  |  |  |  |                                 |  |  |  |                                     |  |  |  |                                               |  |  |  |                                                            |  |  |  |                                 |  |  |  |                                  |  |  |  |                                           |  |  |  |                                                              |  |  |  |                                                |  |  |  |                                          |  |  |  |                                                            |  |  |  |                                                                  |  |  |  |                                                         |  |  |  |                                                                                          |  |  |  |                                                         |  |  |  |                                                               |  |  |  |
| <input type="checkbox"/> Feeding tube size # 5, 6, 7 Fr                                                                                                                                                                                                                                                                                                                                                                                                                                                                                                                                                                                                                                                                                                                                                                                                                                                                                                                                                                                                                                                                                                                                                                                                                                                                                                                                                                                                                                                                                                                                                                                                                                                                                                                                                                                                                                                                                                                                                                                                                                                                                                                                                                                                                                                                                                                                                                                                                                                                                                                                                                                                                                                                                                                                                                                                                                                                                                                                                                                                                                                                                                                                                                                                                                                                                                                                                                                                                                                                                                                                                                                                                                                                                                                                                                                                                                                                                                                                                                                                                                                                                                                                                                                                                                                                                                                                                                                                                                                                                                                                                                                                                                                                                                                                                                                                                                                                                                                                                                                                                                                                                                                                                               |                                                                   |      |          |  |      |      |      |          |                                         |  |  |  |                                                |  |  |  |                                 |  |  |  |                                |  |  |  |                                |  |  |  |                                  |  |  |  |                                 |  |  |  |                                     |  |  |  |                                               |  |  |  |                                                            |  |  |  |                                 |  |  |  |                                  |  |  |  |                                           |  |  |  |                                                              |  |  |  |                                                |  |  |  |                                          |  |  |  |                                                            |  |  |  |                                                                  |  |  |  |                                                         |  |  |  |                                                                                          |  |  |  |                                                         |  |  |  |                                                               |  |  |  |
| <input type="checkbox"/> Tuberculin syringes 1, 2, 5, 10, 50 cc with 22, 24, 26 G needle                                                                                                                                                                                                                                                                                                                                                                                                                                                                                                                                                                                                                                                                                                                                                                                                                                                                                                                                                                                                                                                                                                                                                                                                                                                                                                                                                                                                                                                                                                                                                                                                                                                                                                                                                                                                                                                                                                                                                                                                                                                                                                                                                                                                                                                                                                                                                                                                                                                                                                                                                                                                                                                                                                                                                                                                                                                                                                                                                                                                                                                                                                                                                                                                                                                                                                                                                                                                                                                                                                                                                                                                                                                                                                                                                                                                                                                                                                                                                                                                                                                                                                                                                                                                                                                                                                                                                                                                                                                                                                                                                                                                                                                                                                                                                                                                                                                                                                                                                                                                                                                                                                                              |                                                                   |      |          |  |      |      |      |          |                                         |  |  |  |                                                |  |  |  |                                 |  |  |  |                                |  |  |  |                                |  |  |  |                                  |  |  |  |                                 |  |  |  |                                     |  |  |  |                                               |  |  |  |                                                            |  |  |  |                                 |  |  |  |                                  |  |  |  |                                           |  |  |  |                                                              |  |  |  |                                                |  |  |  |                                          |  |  |  |                                                            |  |  |  |                                                                  |  |  |  |                                                         |  |  |  |                                                                                          |  |  |  |                                                         |  |  |  |                                                               |  |  |  |
| <input type="checkbox"/> Glucostic and multistix strips                                                                                                                                                                                                                                                                                                                                                                                                                                                                                                                                                                                                                                                                                                                                                                                                                                                                                                                                                                                                                                                                                                                                                                                                                                                                                                                                                                                                                                                                                                                                                                                                                                                                                                                                                                                                                                                                                                                                                                                                                                                                                                                                                                                                                                                                                                                                                                                                                                                                                                                                                                                                                                                                                                                                                                                                                                                                                                                                                                                                                                                                                                                                                                                                                                                                                                                                                                                                                                                                                                                                                                                                                                                                                                                                                                                                                                                                                                                                                                                                                                                                                                                                                                                                                                                                                                                                                                                                                                                                                                                                                                                                                                                                                                                                                                                                                                                                                                                                                                                                                                                                                                                                                               |                                                                   |      |          |  |      |      |      |          |                                         |  |  |  |                                                |  |  |  |                                 |  |  |  |                                |  |  |  |                                |  |  |  |                                  |  |  |  |                                 |  |  |  |                                     |  |  |  |                                               |  |  |  |                                                            |  |  |  |                                 |  |  |  |                                  |  |  |  |                                           |  |  |  |                                                              |  |  |  |                                                |  |  |  |                                          |  |  |  |                                                            |  |  |  |                                                                  |  |  |  |                                                         |  |  |  |                                                                                          |  |  |  |                                                         |  |  |  |                                                               |  |  |  |
| <input type="checkbox"/> Capillary tubes for microhaematocrit                                                                                                                                                                                                                                                                                                                                                                                                                                                                                                                                                                                                                                                                                                                                                                                                                                                                                                                                                                                                                                                                                                                                                                                                                                                                                                                                                                                                                                                                                                                                                                                                                                                                                                                                                                                                                                                                                                                                                                                                                                                                                                                                                                                                                                                                                                                                                                                                                                                                                                                                                                                                                                                                                                                                                                                                                                                                                                                                                                                                                                                                                                                                                                                                                                                                                                                                                                                                                                                                                                                                                                                                                                                                                                                                                                                                                                                                                                                                                                                                                                                                                                                                                                                                                                                                                                                                                                                                                                                                                                                                                                                                                                                                                                                                                                                                                                                                                                                                                                                                                                                                                                                                                         |                                                                   |      |          |  |      |      |      |          |                                         |  |  |  |                                                |  |  |  |                                 |  |  |  |                                |  |  |  |                                |  |  |  |                                  |  |  |  |                                 |  |  |  |                                     |  |  |  |                                               |  |  |  |                                                            |  |  |  |                                 |  |  |  |                                  |  |  |  |                                           |  |  |  |                                                              |  |  |  |                                                |  |  |  |                                          |  |  |  |                                                            |  |  |  |                                                                  |  |  |  |                                                         |  |  |  |                                                                                          |  |  |  |                                                         |  |  |  |                                                               |  |  |  |

| No. | Question                                                                                                                                                        | Answer | Remarks/Notes |
|-----|-----------------------------------------------------------------------------------------------------------------------------------------------------------------|--------|---------------|
|     | <input type="checkbox"/> Cotton, surgical gauze<br><input type="checkbox"/> Normal saline, 10% dextrose infusion bottle<br><input type="checkbox"/> Other _____ |        |               |

### Part VI. Healthcare costs

*The purpose of the following questions is to determine the costs of treatment for hospital-acquired infections in the healthcare facility among mothers and neonates. Costs can be reported per case or per inpatient day (should the respondent provide the average hospital length of stay) and when possible, should include the cost of (1) hospitalization, (2) diagnostic tests, and (3) treatment (e.g., drug doses) among other direct medical costs.*

| No.  | Question                                                                                                    | Answer | Remarks/Notes |
|------|-------------------------------------------------------------------------------------------------------------|--------|---------------|
| T1.1 | What is the average cost per case of treating intrapartum chorioamnionitis after caesarean delivery?        |        |               |
| T1.2 | What is the average cost per case of treating postpartum endometritis after caesarean delivery?             |        |               |
| T1.3 | What is the average cost per case of treating a surgical site infection resulting from an episiotomy?       |        |               |
| T1.4 | What is the average cost per case of treating a surgical site infection resulting from a caesarean section? |        |               |

| No.  | Question                                                                                                                    | Answer | Remarks/Notes |
|------|-----------------------------------------------------------------------------------------------------------------------------|--------|---------------|
|      |                                                                                                                             |        |               |
| T1.5 | What is the average cost per case of treating a skin and soft tissue infection resulting from a caesarean section?          |        |               |
| T1.6 | What is the average cost per case of treating postpartum (or puerperal) sepsis in mothers?                                  |        |               |
| T2.1 | What is the average cost per case of treating neonatal early-onset septicemia?                                              |        |               |
| T2.2 | What is the average cost per case of treating neonatal late-onset septicemia?                                               |        |               |
| T2.3 | What is the average cost per case of treating a bacterial catheter-associated urinary tract infection (CAUTI) in a newborn? |        |               |

| No.  | Question                                                                                            | Answer | Remarks/Notes |
|------|-----------------------------------------------------------------------------------------------------|--------|---------------|
| T2.4 | What is the average cost per case of treating a bacterial bloodstream infection (BSI) in a newborn? |        |               |
| T2.5 | What is the average cost per case of treating ventilator-associated pneumonia (VAP)?                |        |               |
| T2.6 | What is the average cost per case of treating hospital-acquired pneumonia (HAP)?                    |        |               |

>> *End of questionnaire.*
